# Supplementary material for: Understanding the nature of quinoidal and zwitterionic states in carbazole-based diradicals
Source: Royal Society of Chemistry journal article supplement (doi:10.1039/d0cc01948h), 2020-01-01
Supplement: d0cc01948h1.pdf [file d0cc01948h1.pdf]

*Supplementary Information for:*

## **Understanding the Nature of Quinoidal and Zwitterionic State in Carbazole-Based Diradicals**

Guodong Xue <sup>a</sup>, Xiaoguang Hu <sup>a,c\*</sup>, Hanjiao Chen <sup>d</sup>, Lingbing Ge <sup>a</sup>,  
Wenxiang Wang <sup>a</sup>, Jingyuan Xiong <sup>e</sup>, Fang Miao <sup>a</sup> & Yonghao Zheng <sup>a,b\*</sup>

<sup>a</sup> School of Optoelectronic Science and Engineering, University of Electronic Science and Technology of China (UESTC), Chengdu 610054, P. R. China.

<sup>b</sup> Key Laboratory for Organic Electronics and Information Displays, Institute of Advanced Materials (IAM), Nanjing University of Posts & Telecommunications, 9 Wenyuan Road, Nanjing 210023, P. R. China.

<sup>c</sup> School of Materials Science and Engineering, Zhengzhou University, Zhengzhou 450001, Henan, PR China

<sup>d</sup> Analytical & Testing Center, Sichuan University, Chengdu 610064, P. R. China.

<sup>e</sup> West China School of Public Health and Health Food Evaluation Research Center, Sichuan University, Chengdu 610041, P. R. China.

### **Corresponding Authors:**

\*E-mail: [huxiaoguang126@126.com](mailto:huxiaoguang126@126.com).

\*E-mail: [zhengyonghao@uestc.edu.cn](mailto:zhengyonghao@uestc.edu.cn).

## 1. General information

All chemicals and reagents were purchased from Alfa, Acros and Adamas without further purifications. Anhydrous tetrahydrofuran (THF) was distilled over sodium under a nitrogen atmosphere. Column chromatography was performed on Haiyang silica gel (200-300 mesh). All reactions were monitored by thin layer chromatography (TLC) using commercial Huanghai glass plates (HSGF 254, 2.5 x 8 cm) visualized under UV radiation at 254 and 365 nm. The acid sensitive compounds were purified with trimethylamine pretreated silica gel and all organic extracts were dried by anhydrous Na<sub>2</sub>SO<sub>4</sub>. UV/Vis/NIR absorption spectra were performed using a Shimadzu UV-2600 UV-VIS spectrophotometer. MALDI-TOF mass spectra (MS) were measured on a SHIMADZU iD plus Performance using anthracene-1, 8, 9-triol as matrix. High resolution mass spectra (HRMS) were recorded on a Waters-Q-TOF-Premier (ESI). NMR spectra were measured by a Bruker AV III HD 400 MHz. ESR spectroscopy measurement was conducted by a Bruker EMX plus X-band spectrometer with 9.8 GHz microwave frequency. Elemental analysis measurements were performed on a Leeman Labs Euro EA 3000 elemental analyzer. Single Crystal X-Ray Diffraction were measured by a Gemini X-ray Single Crystal Diffractometer. Cyclic voltammograms were measured on a Shanghai Chenhua CHI 660E electrochemical workstation.

## 2. Preparation of materials

### Synthesis of 3,6-bis(2,6-di-*tert*-butylphenol-4-yl)-9-(2-ethylhexyl) carbazole (Cb36OH)

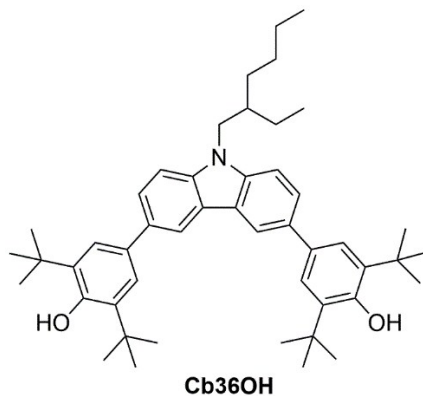

3,6-dibromo-9-(2-ethylhexyl)-9*H*-carbazole[1] (200.0 mg, 0.5 mmol), tris(dibenzylideneacetone)dipalladium(0) (11.0 mg, 12.0  $\mu\text{mol}$ ), 3,5-di-*tert*-butyl-4-hydroxyphenyl boronic acid[2] (386.0 mg, 1.2 mmol), tri(*o*-tolyl)phosphine (13.0 mg, 42.8  $\mu\text{mol}$ ) and tetrabutylammonium hydroxide (TBAH) (731.0 mg, 870.0  $\mu\text{mol}$ ) were charged in a 50 mL two neck flask with 7.5 mL toluene and 1.5 mL water under nitrogen. The mixture was heated to reflux for 2 h. The reaction was cooled down to room temperature and hydrochloric acid (1 N, 50 mL) was added, and then the mixture was extracted with dichloromethane (3 x 50 mL). The collected organic layers were washed with water, dried over anhydrous  $\text{Na}_2\text{SO}_4$  and the solvent was removed under reduced pressure. The residue was purified by column chromatography ( $\text{SiO}_2$ , hexane/DCM, V/V = 5: 1, as eluent) to give **Cb36OH** as a yellow solid (112.0 mg, 35%).

$^1\text{H}$  NMR (400 MHz,  $\text{CDCl}_3$ )  $\delta$  8.33 (s, 2H), 7.73 (d,  $J = 8.0$  Hz, 2H), 7.57 (s, 4H), 7.51 (d,  $J = 8.0$  Hz, 2H), 5.29 (s, 2H), 4.21-4.32 (m, 2H), 2.16-2.23 (m, 2H), 1.61 (s, 36H), 1.33-1.61 (m, 8H), 1.02 (t,  $J = 8.0$  Hz, 3H), 0.96 (t,  $J = 8.0$  Hz, 3H).  $^{13}\text{C}$  NMR (100 MHz,  $\text{CDCl}_3$ )  $\delta$  11.0, 14.2, 23.2, 24.5, 29.0, 30.5, 31.1, 34.6, 39.6, 47.7, 109.1, 118.7, 123.4, 124.4, 125.4, 133.6, 133.7, 136.2, 140.5, 153.0. HRMS (ESI<sup>+</sup>): calcd. for  $\text{C}_{48}\text{H}_{66}\text{NO}_2$  687.5015, found  $[\text{M}+\text{H}]^+$  688.5062.

**Synthesis of 2,7-bis(2,6-di-*tert*-butylphenol-4-yl)-9-(2-ethylhexyl) carbazole (Cb27OH)**

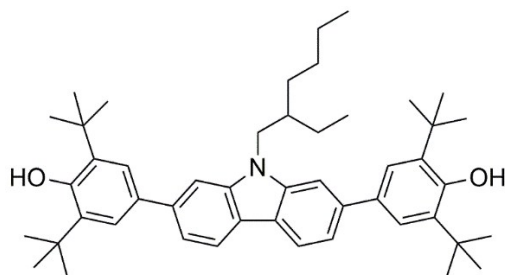

**Cb27OH**

2,7-dibromo-9-(2-ethylhexyl)-9*H*-carbazole[3] (420.0 mg, 1.0 mmol), tris(dibenzylideneacetone)dipalladium(0) (34.0 mg, 37.2  $\mu$ mol), 3,5-di-*tert*-butyl-4-hydroxyphenyl boronic acid (832.0 mg, 2.5 mmol), tri(*o*-tolyl)phosphine (28.0 mg, 92.1  $\mu$ mol) and tetrabutylammonium hydroxide (TBAH) (1.5 g, 1.8 mmol) were charged in a 50 mL two neck flask with 15.0 mL toluene and 2.5 mL water under nitrogen. The mixture was heated to reflux for 2 h. The reaction was cooled down to room temperature and hydrochloric acid (1 M, 50 mL) was added, and then the mixture was extracted with dichloromethane (3 x 50 mL). The collected organic layers were washed with water, dried over anhydrous Na<sub>2</sub>SO<sub>4</sub> and the solvent was removed under reduced pressure. The residue was purified by column chromatography (SiO<sub>2</sub>, hexane/DCM, V/V = 5: 1, as eluent) to give **Cb27OH** as a yellow solid (145.0 mg, 22%). <sup>1</sup>H NMR (400 MHz, CDCl<sub>3</sub>)  $\delta$  8.09 (d, *J* = 8.0 Hz, 2H), 7.54 (s, 4H), 7.52 (s, 2H), 7.43 (s, 2H), 7.41 (s, 2H), 5.27 (s, 2H), 4.27-4.18 (m, 2H), 2.16-2.13 (m, 1H), 1.54-1.47 (m, 36H), 1.45- 1.26 (m, 8H), 0.97 (t, *J* = 8.0 Hz, 3H), 0.87 (t, *J* = 8.0 Hz, 3H). <sup>13</sup>C NMR (100 MHz, CDCl<sub>3</sub>)  $\delta$  10.9, 14.2, 23.2, 24.6, 29.4, 30.4, 31.4, 34.6, 39.7, 47.3, 107.2, 118.6, 120.3, 121.4, 124.5, 133.7, 136.3, 139.9, 142.0, 153.4. HRMS (ESI<sup>+</sup>): calcd. for C<sub>48</sub>H<sub>66</sub>NO<sub>2</sub> 687.5015, found [M+H]<sup>+</sup> 688.5091.

## Synthesis of Cb36O

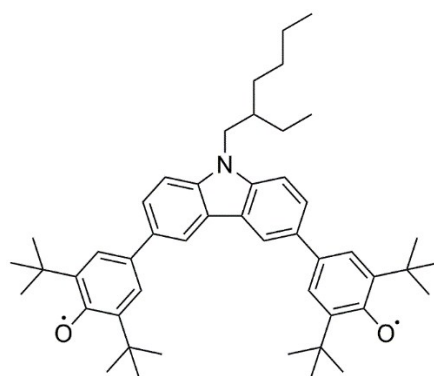

**Cb36O**

**Cb36OH** (15.0 mg, 21.8  $\mu\text{mol}$ ) and lead (IV) oxide (375.0 mg, 1.6 mmol) were suspended in dry dichloromethane (15.0 mL). The mixture was stirred at room temperature for 2 hours. The excess lead (IV) oxide was removed by suction filtration and the resulting solvent was removed under reduced pressure. The solid was purified by triethylamine pretreated column chromatography ( $\text{SiO}_2$ , hexane/DCM, V/V = 3: 1) to yield **Cb36O** as a dark green solid (14.1 mg, 94 %). HRMS (ESI<sup>+</sup>): calcd. for  $\text{C}_{48}\text{H}_{64}\text{NO}_2$  685.4859, found  $[\text{M}+\text{H}]^+$  686.4928.

## Synthesis of Cb27O

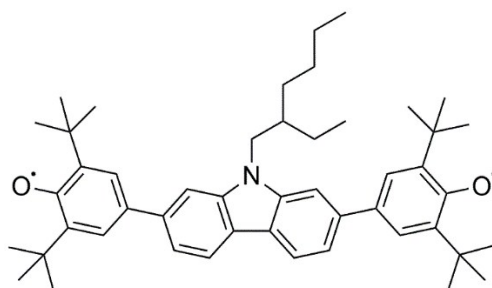

**Cb27O**

**Cb27OH** (20.0 mg, 29.0  $\mu\text{mol}$ ) and lead (IV) oxide (0.5 g, 2.1 mmol) were suspended in dry dichloromethane (15 mL). The mixture was stirred at room temperature for 1 hour. The excess lead (IV) oxide was removed by suction filtration and the resulting solvent was removed under reduced pressure. The solid was purified by triethylamine pretreated column chromatography ( $\text{SiO}_2$ , hexane/DCM, V/V = 3: 1) to yield **Cb27O** as a dark green solid (18.6 mg, 93%). HRMS (ESI<sup>+</sup>): calcd. for  $\text{C}_{48}\text{H}_{64}\text{NO}_2$  685.4859, found  $[\text{M}+\text{H}]^+$  686.4846.

### Methods to grow single crystals

Three common methods have been used to grow single crystals for X-ray diffraction.

Method A: slow evaporation of compounds in pure or mixed solutions (e.g. DCM, toluene, THF, MeOH, DCM/MeOH, DCM/toluene, DCM/hexane, DCM/EA, DCM/acetone) in 4 mL glass vials (with cap).

Method B: slow diffusion of poor solvents e.g. hexane, toluene and MeOH to saturated DCM solution of compounds in NMR tubes (with cap) and 4 mL glass vials (with cap) at room temperature and -20 °C (in refrigerator).

Method C: slow cooling the hot solutions of compounds in pure or mixed solvents (e.g. toluene, THF, EA, MeOH, acetone, DCM/toluene, DCM/hexane, DCM/EA, DCM/MeOH, DCM/acetone).

The single crystal of **Cb27OH** suitable for X-ray crystallographic analysis was grown by method A using pure methanol solution. Unfortunately, only amorphous powders were obtained for **Cb36OH** using above methods. **Cb36O** and **Cb27O** were not stable in solutions so we failed to obtain suitable single crystal of both diradicals for X-ray diffraction.

### 3. NMR and Mass spectra

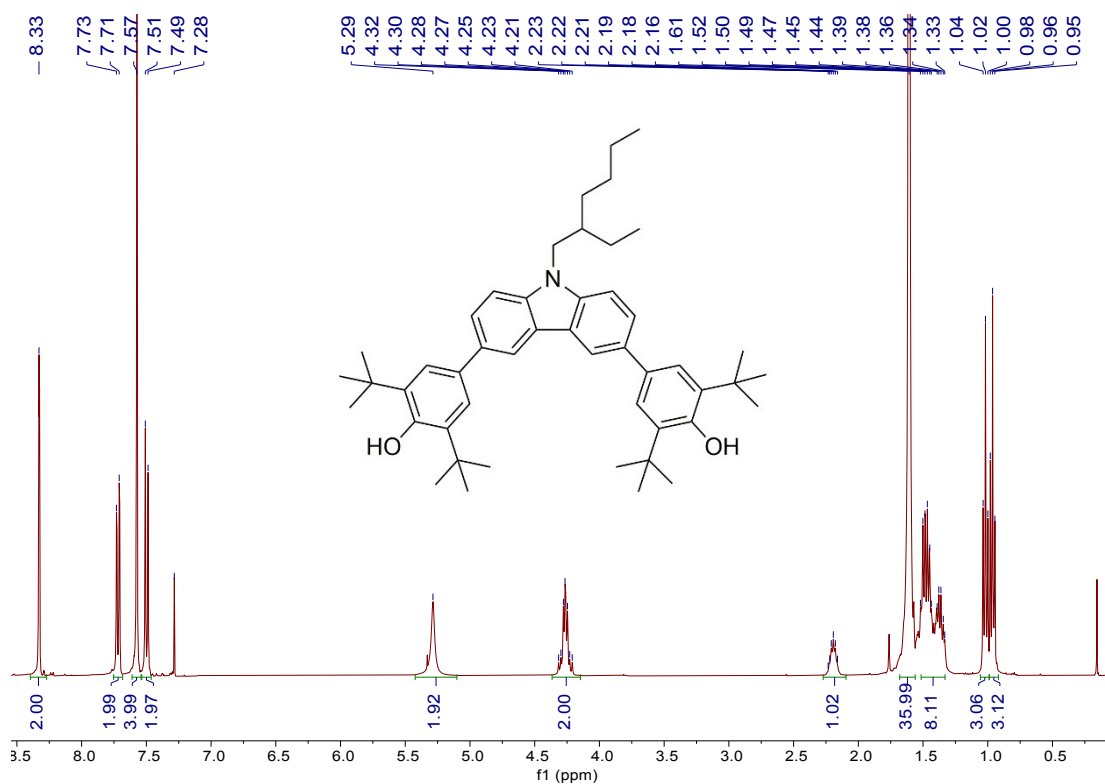

Figure S1. <sup>1</sup>H NMR spectrum of Cb36OH.

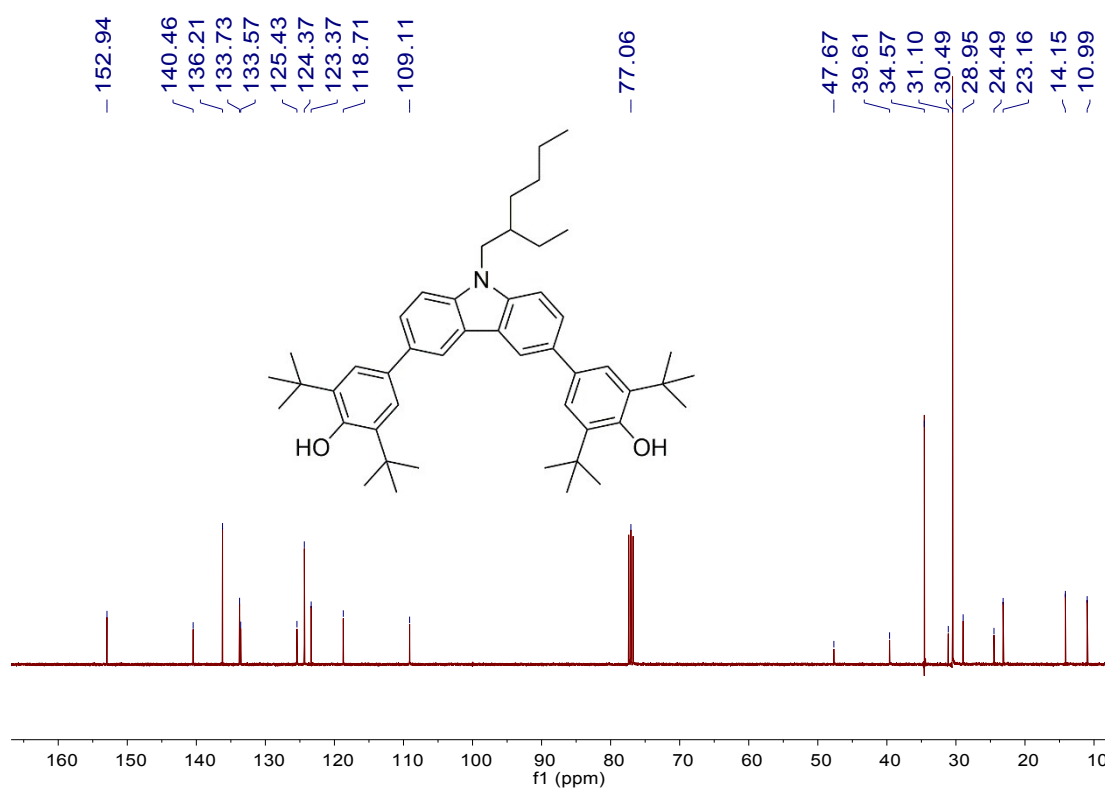

Figure S2. <sup>13</sup>C NMR spectrum of Cb36OH.

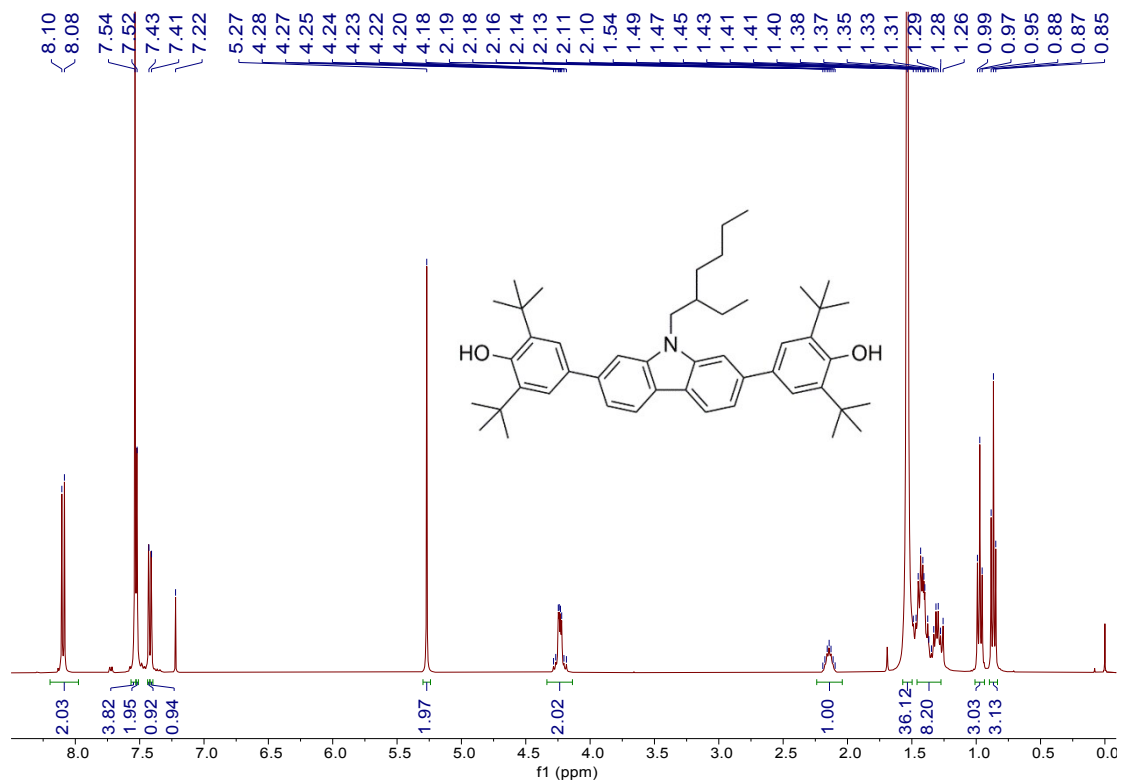

Figure S3. <sup>1</sup>H NMR spectrum of Cb27OH.

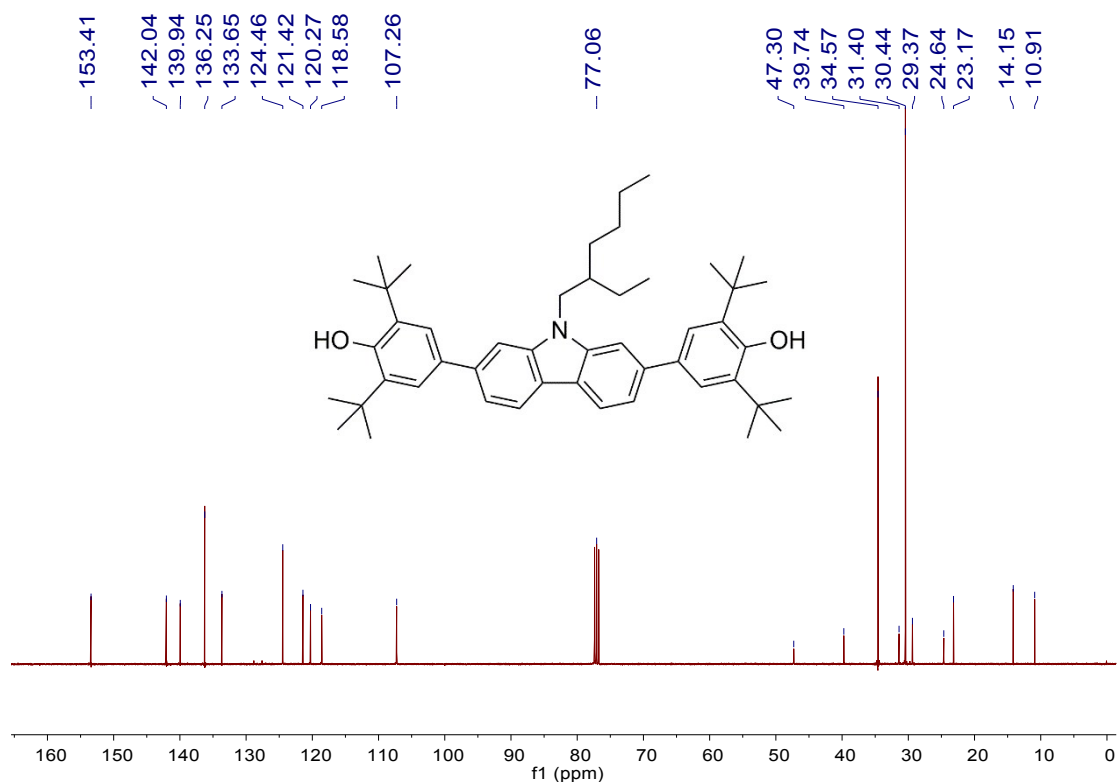

Figure S4. <sup>13</sup>C NMR spectrum of Cb27OH.



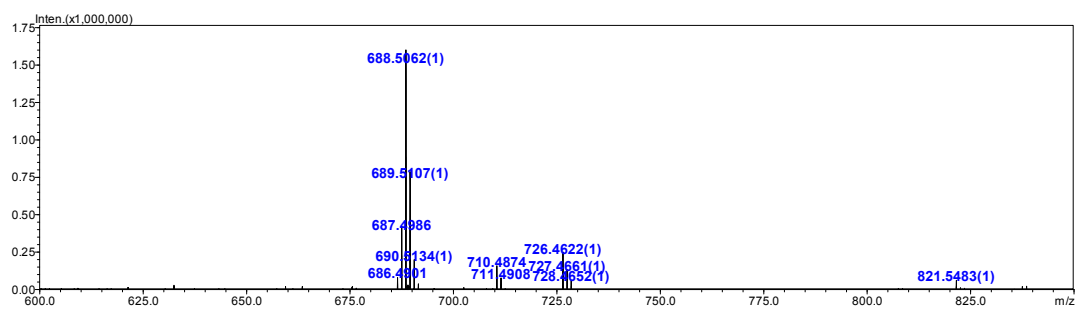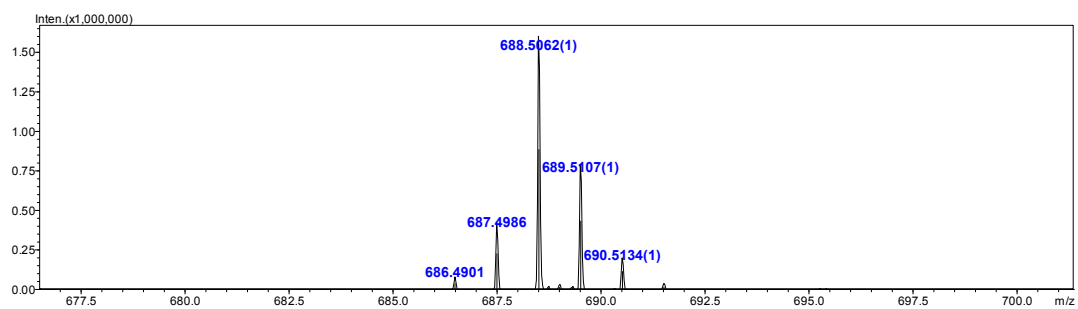

**Figure S5.** HR mass spectra of Cb36OH (ESI+)

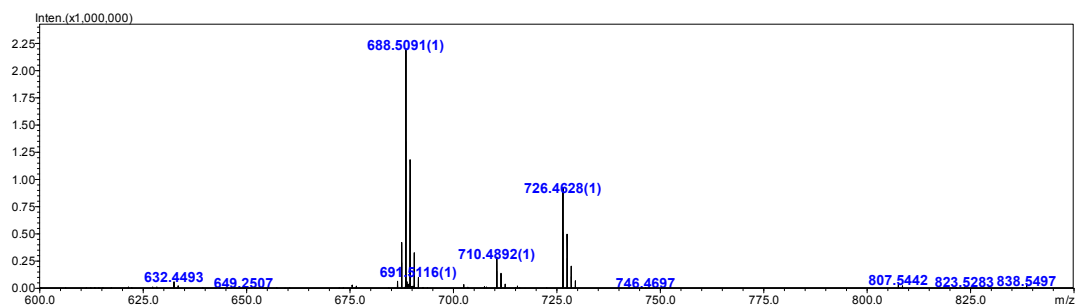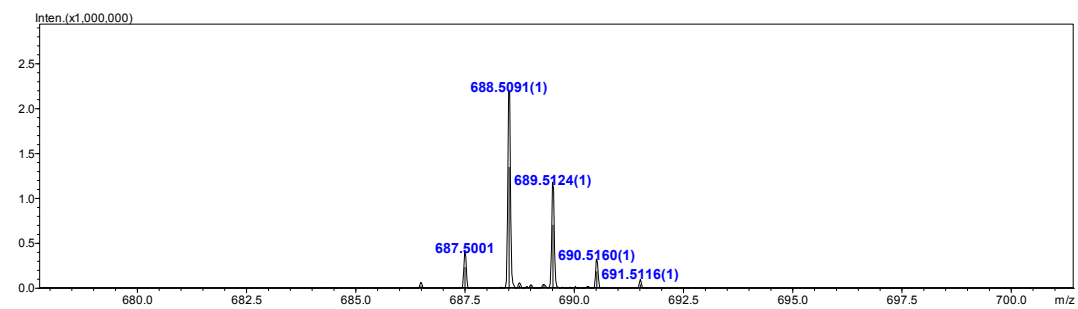

**Figure S6.** HR mass spectra of Cb27OH (ESI+)

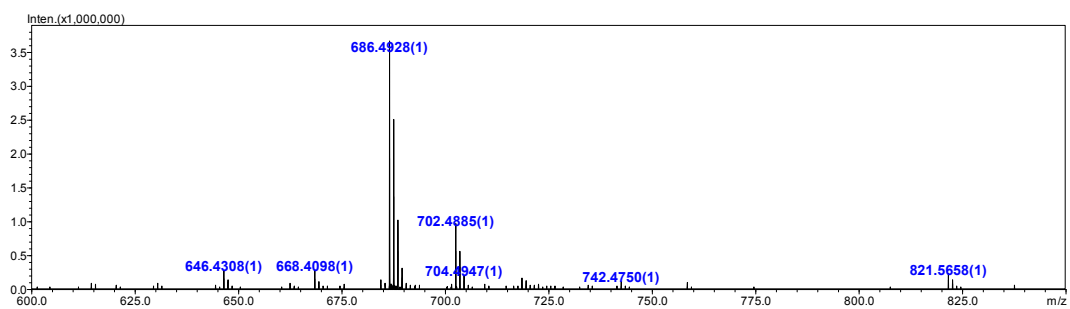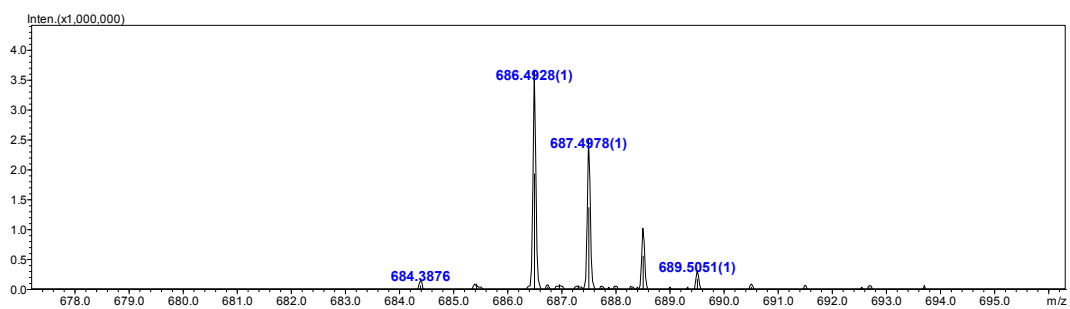

**Figure S7.** HR mass spectra of Cb360 (ESI+)

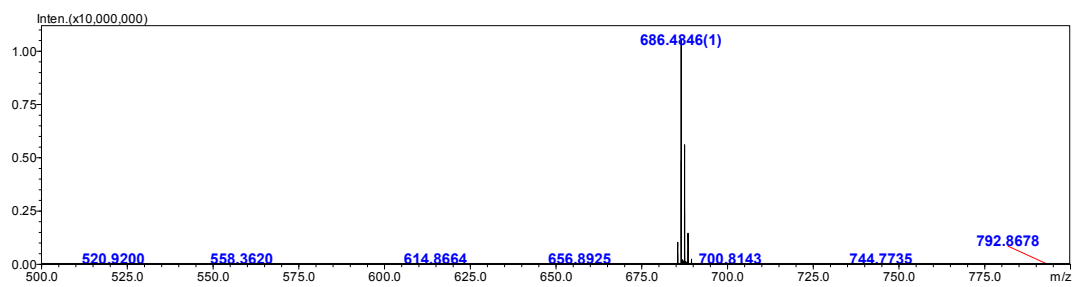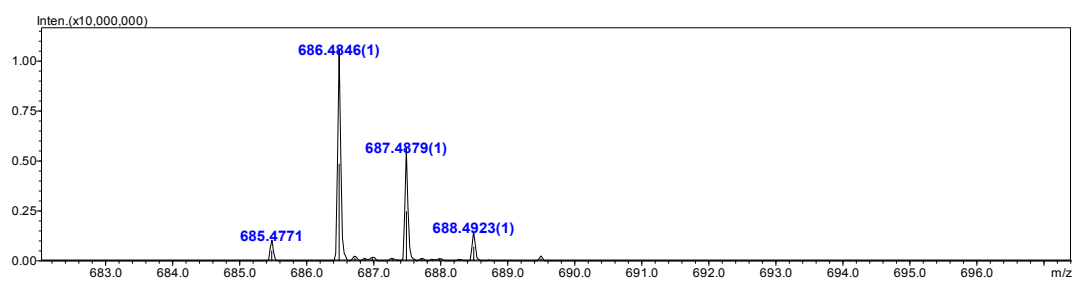

**Figure S8.** HR mass spectra of Cb270 (ESI+)

#### 4. Optical energy gaps

UV/vis/NIR absorption spectra (Figure S9) revealed that the absorption onsets were 728 nm, and 948 nm for **Cb36O** and **Cb27O**, respectively. The corresponding optical energy gaps  $E_g^{\text{Opt}}$  are 1.70 and 1.31 eV for **Cb36O** and **Cb27O**, respectively.

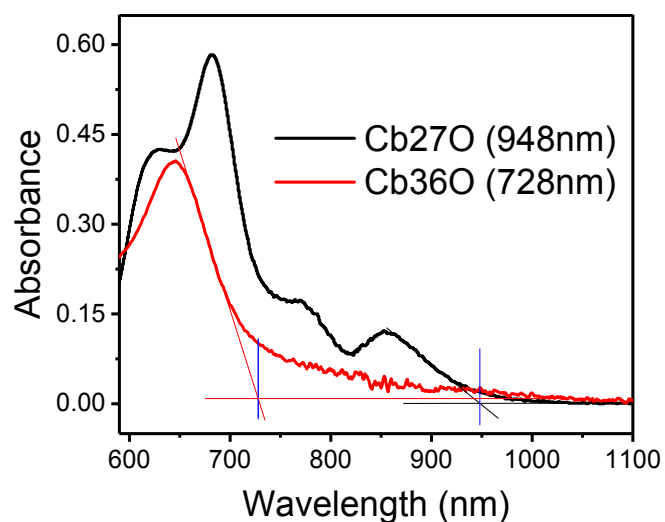

**Figure S9.** The partial UV/vis/NIR absorption spectra of **Cb36O** and **Cb27O** in dry DCM. The cross indicates the onset of each compound.

#### 5. UV/vis/NIR absorption spectra of precursors

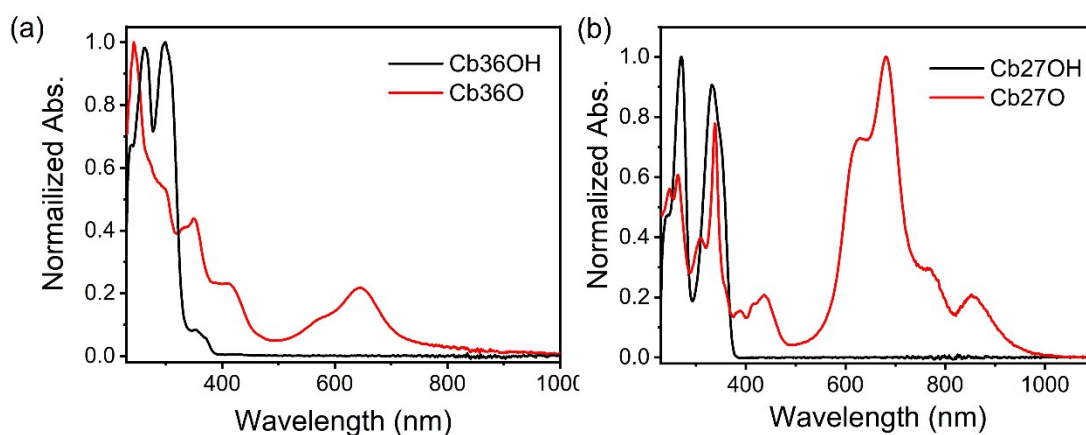

**Figure S10.** The UV/vis/NIR absorption spectra of **Cb36O** and **Cb36OH** (a), **Cb27O** and **Cb27OH** (b) in dry DCM.

## 6. Photostability Test

The photostability test indicates that the half-life is 18.3 and 10.7 min for **Cb36O** (changes of the optical density at 649 nm) and **Cb27O** (changes of the optical density at 679 nm), respectively. The concentration of both samples is around  $5 \times 10^{-5}$  M in DCM.

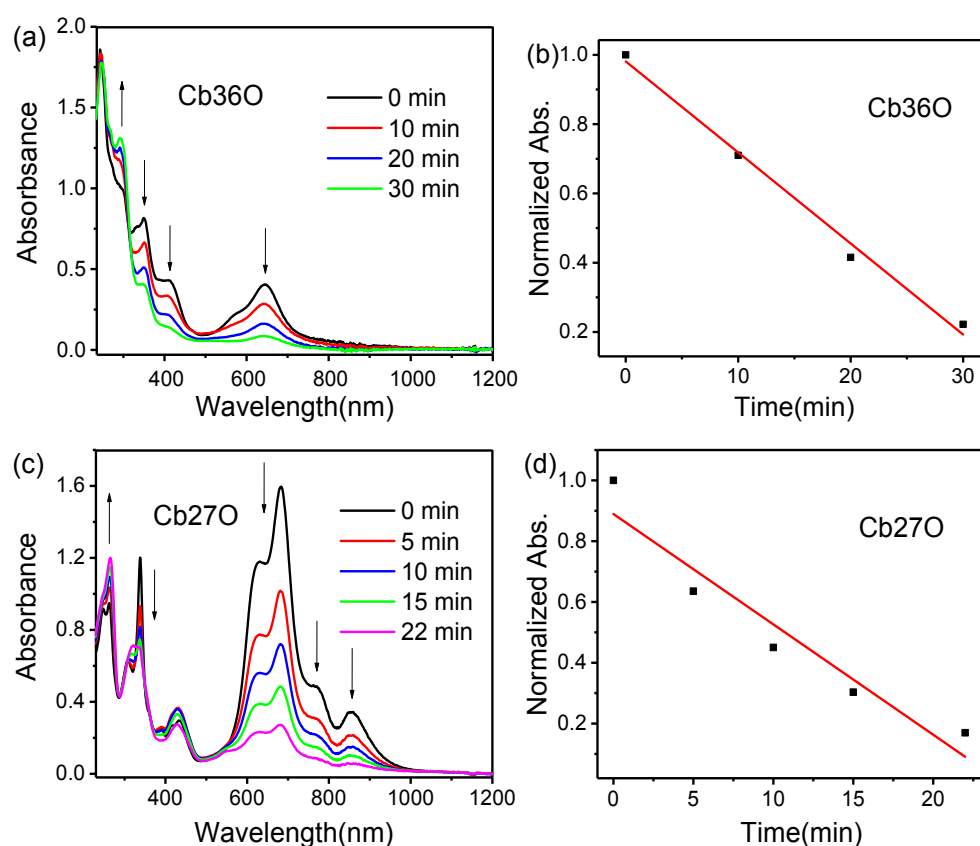

**Figure S11.** UV/vis/NIR absorption spectra of **Cb27O** (a) and **Cb36O** (c) in DCM (ca.  $5 \times 10^{-5}$  M). The change of the optical density at the absorption maximum with the irradiation time (b) and (d) under a 400 W white light lamp. The distance between sample and lamp is 20 cm.

In addition, nitrogen-centered diradicals have good stability due to efficient electron delocalization and steric effect, the half-life ( $t_{1/2}$ ) of **CDR1** upon irradiation with 400 W white light in the ambient environment is estimated to be 10 hours. The stability of oxygen-centered diradicals **Cb36O** and **Cb27O** decrease with smaller  $t_{1/2}$  value of 18.3

and 10.7 min, respectively. While carbon-centered *m*-Cz-ph and *p*-Cz-alky become active and oligomerize quickly.

## 7. Chemical stability Test

The freshly prepared solution samples gradually decomposed in dark at room temperature. The yield half-life ( $t_{1/2}$ ) was 423 min (649 nm) for **Cb36O**, and 593 min (679 nm) for **Cb27O**. The concentration of both samples is around  $5 \times 10^{-5}$  M in DCM.

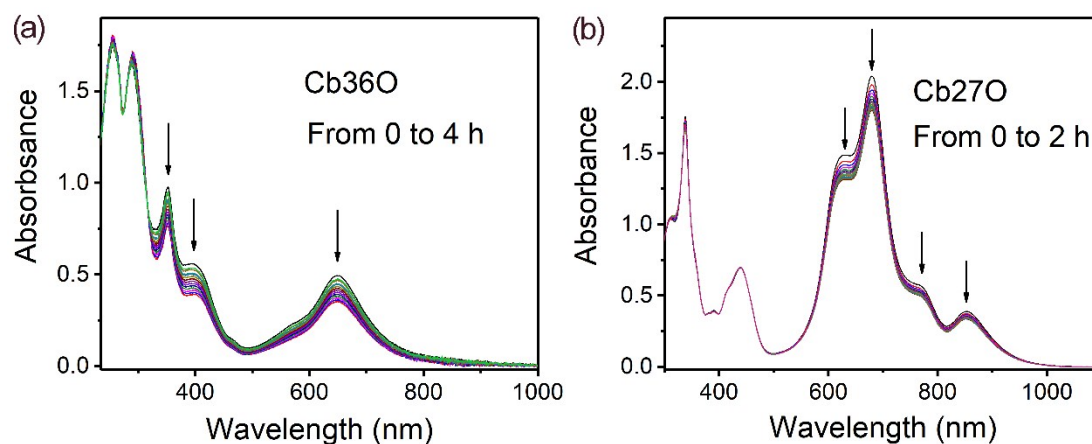

**Figure S12.** UV-Vis-NIR absorption spectra of **Cb36O** (a) and **Cb27O** (b) in DCM (ca.  $5 \times 10^{-5}$  M) for different time.

## 8. Crystallographic data

Single crystals of **Cb27OH** suitable for X-ray crystallographic analysis were grown by slow solvent evaporation method using methanol solution. The structure is shown in Figure S12. **Cb27OH** crystallizes in a monoclinic system, space group  $P2_1/n$  with a R-factor of 7.1%. The phenoxy substituents are rotated out of the carbazole-plane by  $44.86^\circ/39.68^\circ$ . In the crystal packing, the molecules adopt an antiparallel packing mode (Figure S13) in which the closest interplanar distance is 3.840 Å (Figure S14).

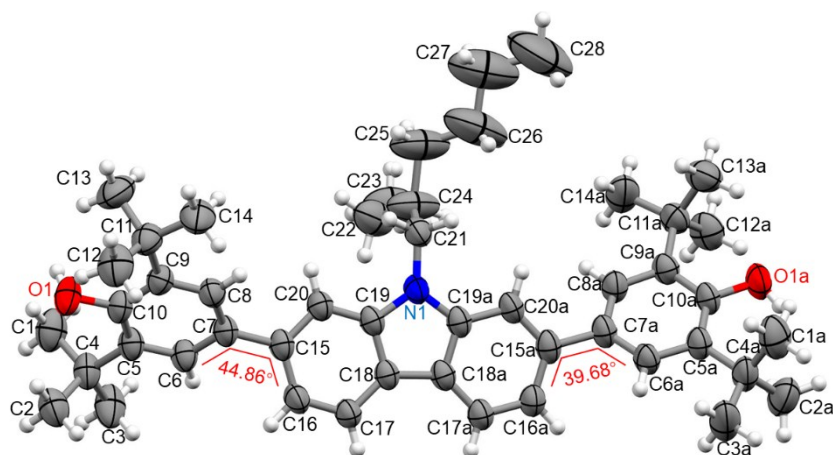

**Figure S13.** Single-crystal X-ray structure of **Cb27OH** with thermal ellipsoids shown at the 50% probability level.

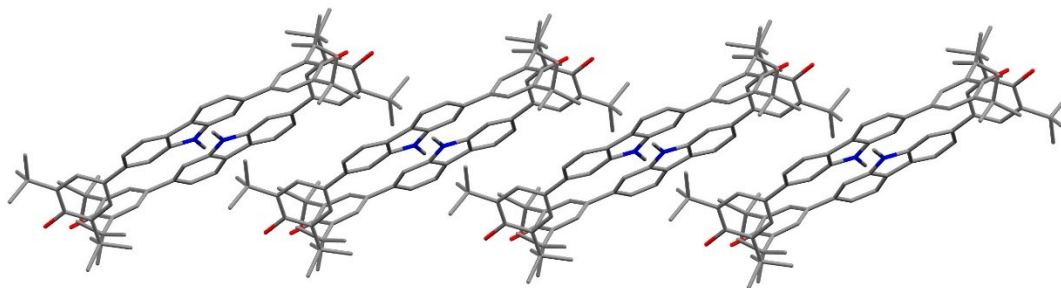

**Figure S14.** Partial solid-state packing of **Cb27OH** (hydrogen atoms and alkyl chains were omitted for clarity).

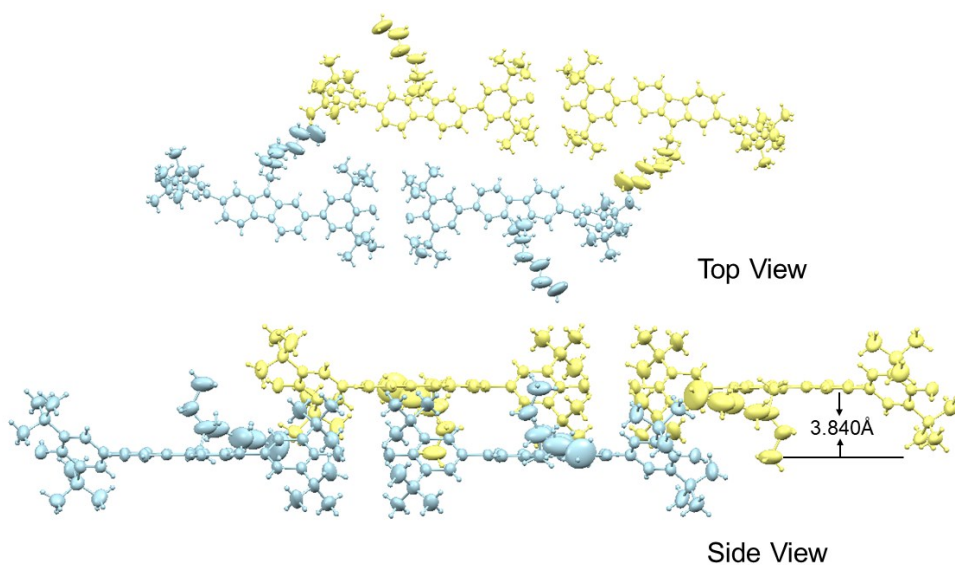

**Figure S15.** Crystal structure of **Cb27OH** (thermal ellipsoids at 50% probability level) with top view and side view.

**Table S1.** Crystal data and structure refinement for **Cb27OH**.

|                        |                                                          |
|------------------------|----------------------------------------------------------|
| Identification code    | Cb27OH                                                   |
| Chemical formula       | C <sub>48</sub> H <sub>65</sub> NO <sub>2</sub>          |
| Formula weight         | 688.01 g/mol                                             |
| Temperature            | 293.32 K                                                 |
| Crystal size           | 0.65 x 0.6 x 0.3 mm                                      |
| Crystal system         | monoclinic                                               |
| Space group            | P2 <sub>1</sub> /n                                       |
| Unit cell dimensions   | a = 12.1364(3) Å<br>b = 17.5731(4) Å<br>c = 22.0778(4) Å |
| Volume                 | 4703.14(17) Å <sup>3</sup>                               |
| Z                      | 4                                                        |
| Density (calculated)   | 0.972 g/cm <sup>3</sup>                                  |
| Absorption coefficient | 0.437 mm <sup>-1</sup>                                   |
| F(000)                 | 1504.0                                                   |

**Table S2.** Data collection and structure refinement for **Cb27OH**.

|                                 |                                                               |
|---------------------------------|---------------------------------------------------------------|
| Identification code             | Cb27OH                                                        |
| Theta range for data collection | 8.018 to 145.792°                                             |
| Index ranges                    | -14<=h<=15, -21<=k<=13, -20<=l<=27                            |
| Reflections collected           | 26933                                                         |
| Independent reflections         | 9218 [R <sub>int</sub> = 0.0313, R <sub>sigma</sub> = 0.0265] |
| Structure solution technique    | Intrinsic Phasing                                             |
| Structure solution program      | ShelXL                                                        |
| Refinement method               | Least Squares minimisation                                    |

|                                   |                               |
|-----------------------------------|-------------------------------|
| Refinement program                | ShelXL                        |
| Data / restraints / parameters    | 9218 / 30 / 486               |
| Goodness-of-fit on F <sup>2</sup> | 1.027                         |
| Final R indexes                   | I>2σ(I)                       |
|                                   | all data                      |
| Largest diff. peak and hole       | 0.25 / -0.28 eÅ <sup>-3</sup> |

---

**Table S3.** Bond lengths (Å) for **Cb27OH**.

| Atom | Atom | Lengths (Å) | Atom | Atom | Lengths (Å) |
|------|------|-------------|------|------|-------------|
| N1   | C19  | 1.384(3)    | C10  | C9   | 1.411(3)    |
| N1   | C21  | 1.446(3)    | C10  | C5   | 1.401(3)    |
| O1   | C10  | 1.375(3)    | C9   | C8   | 1.386(3)    |
| O1   | H1   | 0.820       | C5   | C6   | 1.391(3)    |
| C1   | C4   | 1.534(4)    | C6   | C7   | 1.391(3)    |
| C2   | C4   | 1.524(4)    | C8   | C7   | 1.389(3)    |
| C3   | C4   | 1.536(4)    | C7   | C15  | 1.488(3)    |
| C4   | C5   | 1.538(3)    | C15  | C20  | 1.384(3)    |
| C12  | C11  | 1.525(4)    | C15  | C16  | 1.405(3)    |
| C13  | C11  | 1.541(4)    | C20  | C19  | 1.386(3)    |
| C14  | C11  | 1.527(4)    | C16  | C17  | 1.375(3)    |
| C11  | C9   | 1.540(3)    | C19  | C18  | 1.412(3)    |
| C21  | C24  | 1.511(5)    | C17  | C18  | 1.390(3)    |
| C24  | C22  | 1.385(8)    | C18  | C18a | 1.446(3)    |
| C22  | C23  | 1.573(8)    | C6   | H2   | 0.930       |
| C24  | C25  | 1.546(5)    | C8   | H3   | 0.930       |
| C25  | C26  | 1.491(8)    | C20  | H4   | 0.931       |



|     |     |          |     |    |       |
|-----|-----|----------|-----|----|-------|
| C26 | C27 | 1.486(8) | C16 | H5 | 0.931 |
| C27 | C28 | 1.480(1) | C17 | H6 | 0.930 |

---

**Table S4.** Bond angles (°) for **Cb27OH**.

| Atom | Atom | Atom | Angles (°) | Atom | Atom | Atom | Angles (°) |
|------|------|------|------------|------|------|------|------------|
| C19a | N1   | C19  | 108.5(2)   | C9   | C10  | C5   | 122.4(2)   |
| C19a | N1   | C21  | 125.0(2)   | C19  | C20  | C15  | 118.9(2)   |
| C19  | N1   | C21  | 126.4(2)   | C9   | C8   | C7   | 122.9(2)   |
| H1   | O1   | C10  | 109.4      | C18  | C17  | C16  | 119.5(2)   |
| N1   | C19  | C18  | 108.8(2)   | C15  | C16  | C17  | 121.9(2)   |
| N1   | C19  | C20  | 129.3(2)   | C7   | C6   | C5   | 122.6(2)   |
| C18  | C19  | C20  | 121.9(2)   | C10  | C5   | C6   | 117.2(2)   |
| C10  | C9   | C8   | 116.9(2)   | C10  | C5   | C4   | 121.9(2)   |
| C10  | C9   | C11  | 121.8(2)   | C6   | C5   | C4   | 120.9(2)   |
| C8   | C9   | C11  | 121.3(2)   | C9   | C11  | C14  | 111.2(2)   |
| C18a | C18  | C19  | 106.9(2)   | C9   | C11  | C12  | 110.4(2)   |
| C18a | C18  | C17  | 134.6(2)   | C9   | C11  | C13  | 110.2(2)   |
| C19  | C18  | C17  | 118.5(2)   | C14  | C11  | C12  | 107.0(2)   |
| C7   | C15  | C20  | 120.9(2)   | C14  | C11  | C13  | 107.3(2)   |
| C7   | C15  | C16  | 119.8(2)   | C12  | C11  | C13  | 110.6(2)   |
| C20  | C15  | C16  | 119.2(2)   | C5   | C4   | C1   | 111.5(2)   |
| C15  | C7   | C8   | 121.3(2)   | C5   | C4   | C3   | 111.2(2)   |
| C15  | C7   | C6   | 120.8(2)   | C5   | C4   | C2   | 110.1(2)   |
| C8   | C7   | C6   | 117.9(2)   | C1   | C4   | C3   | 106.4(2)   |
| O1   | C10  | C9   | 118.2(2)   | C1   | C4   | C2   | 110.7(2)   |
| O1   | C10  | C5   | 119.4(2)   | C3   | C4   | C2   | 106.9(2)   |

---

**Table S5.** Torsion angles (°) for **Cb27OH**.

| Atom | Atom | Atom | Atom | Angles<br>(°) | Atom | Atom | Atom | Atom | Angles<br>(°) |
|------|------|------|------|---------------|------|------|------|------|---------------|
| C16  | C15  | C7   | C6   | 45.0(3)       | C19  | C18  | C17  | C16  | 1.7(3)        |
| C20  | C15  | C7   | C8   | 44.7(3)       | C20  | C15  | C7   | C8   | 44.7(3)       |
| C8a  | C7a  | C15a | C20a | 38.5(3)       | C20  | C15  | C7   | C6   | 135.0(2)      |
| C6a  | C7a  | C15a | C16a | 40.9(3)       | C16  | C15  | C7   | C8   | 135.3(2)      |
| C21  | N1   | C19  | C18  | 178.5(2)      | C7   | C15  | C20  | C19  | 179.9(2)      |
| C21  | N1   | C19a | C18a | 178.5(2)      | C16  | C15  | C20  | C19  | 0.1(3)        |
| C21  | N1   | C19  | C20  | 0.2(3)        | C7   | C15  | C16  | C17  | 179.8(2)      |
| C19a | C18a | C18  | C19  | 0.1(2)        | C20  | C15  | C16  | C17  | 0.2(3)        |
| C19a | N1   | C19  | C18  | 0.8(2)        | C15  | C7   | C8   | C9   | 177.7(2)      |
| C19a | N1   | C19  | C20  | 177.5(2)      | C6   | C7   | C8   | C9   | 2.5(3)        |
| N1   | C19  | C18  | C17  | 180.0(2)      | C15  | C7   | C6   | C5   | 179.5(2)      |
| C20  | C19  | C18  | C17  | 1.5(3)        | C8   | C7   | C6   | C5   | 0.8(3)        |
| N1   | C19  | C20  | C15  | 178.7(2)      | C9   | C10  | C5   | C6   | 2.6(3)        |
| C18  | C19  | C20  | C15  | 0.6(3)        | C9   | C10  | C5   | C4   | 177.4(2)      |
| C8   | C9   | C10  | C5   | 1.0(3)        | C18  | C17  | C16  | C15  | 1.1(3)        |
| C11  | C9   | C10  | C5   | 180.0(2)      | C7   | C6   | C5   | C10  | 1.7(3)        |
| C10  | C9   | C8   | C7   | 1.7(3)        | C7   | C6   | C5   | C4   | 178.3(2)      |
| C11  | C9   | C8   | C7   | 177.4(2)      | C10  | C5   | C4   | C1   | 56.7(3)       |
| C10  | C9   | C11  | C14  | 179.5(2)      | C10  | C5   | C4   | C3   | 175.3(2)      |
| C10  | C9   | C11  | C12  | 60.8(3)       | C10  | C5   | C4   | C2   | 66.5(3)       |
| C10  | C9   | C11  | C13  | 61.7(3)       | C6   | C5   | C4   | C1   | 123.2(2)      |
| C8   | C9   | C11  | C14  | 0.5(3)        | C6   | C5   | C4   | C3   | 4.7(3)        |
| C8   | C9   | C11  | C12  | 118.1(3)      | C6   | C5   | C4   | C2   | 113.5(2)      |

## 9. ESR measurement

The singlet-triplet energy gap of **Cb27O** and **Cb36O** were estimated by fitting the  $I^*T$  vs.  $T$  curve with modified Bleaney-Bowers equation:

$$\chi = \frac{Ng^2\mu_B^2}{kT} \left[ \frac{2}{3 + e^{-2J/kT}} \right] (1 - \rho) + \frac{Ng^2\mu_B^2}{2kT} \rho + TIP(1 - \rho) \quad \text{Equation S1}$$

The  $\rho$  is the fraction of  $s=1/2$  impurity,  $TIP$  is the temperature independent paramagnetism due to a small energy gap between ground singlet state and excited triplet state. The estimated  $2J = -0.96$  kcal/mol for **Cb36O**, with  $\rho = 0.003$ ,  $TIP = 1.7 \times 10^{-3}$  emu/mol, the Adj. R-Square  $>0.99$ . The estimated  $2J = -6.16$  kcal/mol for **Cb27O**, with  $\rho = 0.0003$ ,  $TIP = 2.9 \times 10^{-7}$  emu/mol, the Adj. R-Square  $>0.99$ .

## 10. Cyclic voltammetry

Cyclic voltammograms were measured in dry DCM with 0.1 M  $n\text{Bu}_4\text{NPF}_6$  as supporting electrolyte, Ag/AgCl as reference electrode, glassy carbon as working electrode, Pt wire as counter electrode, and a scan rate at 50 mV/s. The LUMO energy levels of these two compounds were estimated from the half-wave potential  $E_{1/2}$  in Figure S15 using ferrocene as reference. The energy levels are calculated by:

$$LUMO = - (E_{sample}^{red} - E_{Fc/Fc^+}^{red} + 4.8)$$

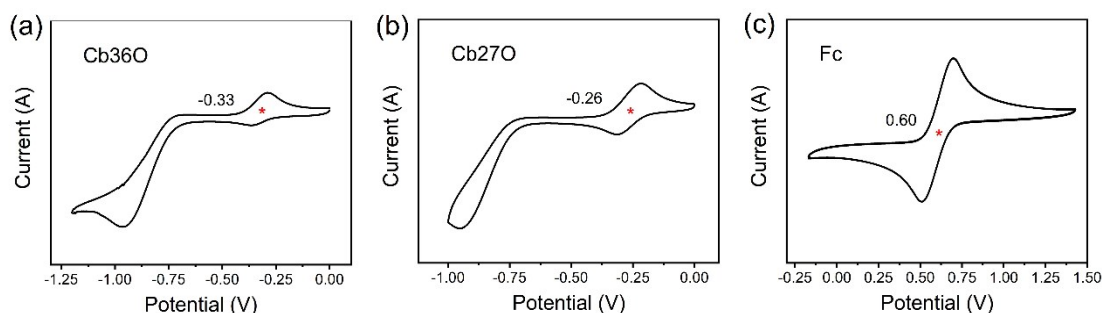

**Figure S16.** Cyclic voltammograms of **Cb36O** (a), **Cb27O** (b) and ferrocene (c) in dry DCM with 0.1 M  $n\text{Bu}_4\text{NPF}_6$  as supporting electrolyte, Ag/AgCl as reference electrode,

glassy carbon as working electrode, Pt wire as counter electrode, and a scan rate at 50 mV/s. The red stars indicate the half-wave potential  $E_{1/2}$ .

## 11. Computational details

All calculations were performed with the Gaussian 16 program suite[4] using the density functional theory (DFT) with the Becke's three-parameter hybrid exchange functionals[5, 6] and the Lee-Yang-Parr correlation functional (B3LYP)[7] employing the 6-311G(d) basis set[8-10] for all atoms. The alkyl chains were replaced by methyl groups to reduce the computation cost. Full geometry optimizations were carried out at the (U)B3LYP/6-311G(d) level, and the obtained stationary points were characterized by frequency calculations. The diradical character  $y_0$  is calculated based on the occupation number of the lowest unoccupied natural orbital (LUNO). A molecule with  $y_0 = 0$  implies a closed-shell structure, whereas a molecule with  $y_0 = 1$  indicates a pure diradical structure[11, 12]. Any intermediate value of  $y_0$  refers to diradical structures. The effective electron exchange interaction  $J_{ab}$  was determined using following equation:

$$J_{ab} = \frac{(E_{BS} - E_T)}{(\langle S^2 \rangle_T - \langle S^2 \rangle_{BS})}$$

Where  $E_{BS}$  and  $E_T$  correspond to the energies of the broken-symmetry (BS) singlet and triplet state, with spin expectation values  $\langle S^2 \rangle_T$  and  $\langle S^2 \rangle_{BS}$  of the triplet state and broken-symmetry singlet, respectively[13]. The spin correction for singlet-triplet energy gap was calculated using the energy difference between BS singlet and open-shell triplet and the correction for spin contamination:

$$\Delta E_{ST} = (E_{BS} - E_T) \frac{\langle S^2 \rangle_T}{(\langle S^2 \rangle_T - \langle S^2 \rangle_{BS})}$$

The time-dependent (TD) DFT calculation was employed with UB3LYP/6-311G(d) level. The spin densities were illustrated using Multiwfn[14] and VMD[15]. The NICS(1)zz[16] value was calculated by standard gauge independent atomic orbital

(GIAO) method based on the optimized geometries at the UB3LYP/6-311(d) level. The typical disjoint SOMO- $\alpha$  and SOMO- $\beta$  orbitals profile further confirm the open-shell singlet ground state (**Fig. S18**). The NICS(1)<sub>zz</sub> of the two diradicals were calculated to investigate the aromaticity (**Fig. S17**). **Cb36O** exhibits a larger NICS(1)<sub>zz</sub>  $\delta$  value of -18.25 ppm at the central carbazole core, while **Cb27O** owns a smaller  $\delta$  value of -15.20 ppm. Less aromaticity for **Cb27O** indicated a major contribution of polyenic structure at ground state because of the quinoidal structure. Meanwhile, the aromatic character of the terminal phenoxy rings shows similar tendency. As a reference, the NICS(1)<sub>zz</sub> value of benzene is calculated to be  $\delta = -29.12$  ppm.

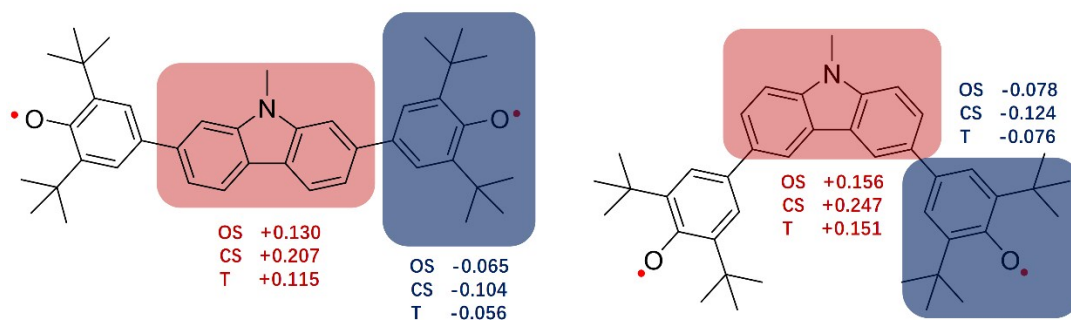

**Figure S17.** Calculated Hirshfeld charges of **Cb27O** and **Cb36O** (a.u.).

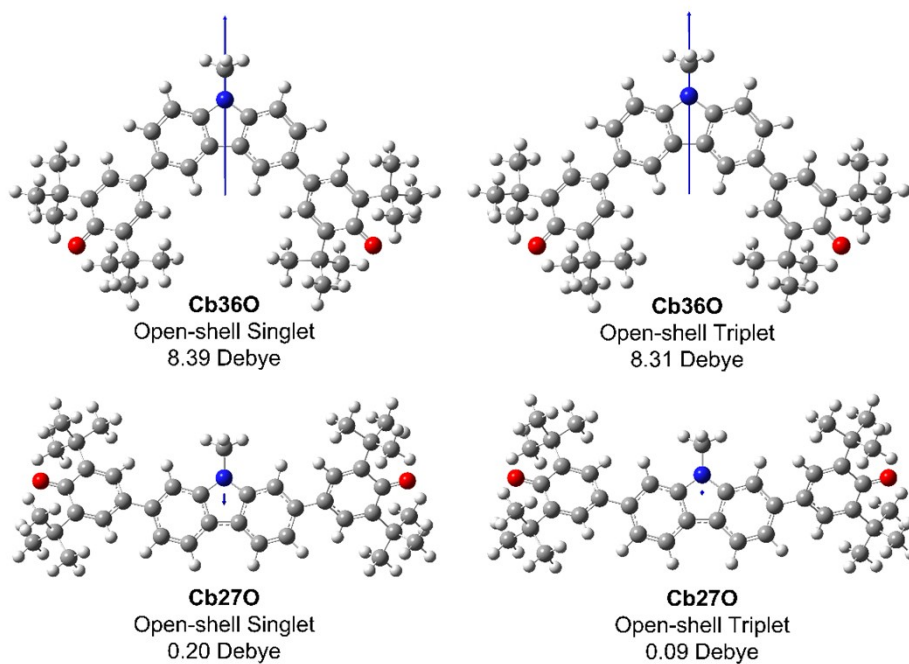

**Figure S18.** Calculated dipole moments (blue arrow) of **Cb360** and **Cb270** at open-singlet ground state and triplet state. (The magnitude of **Cb270** were 3 times to get insight of vectors)

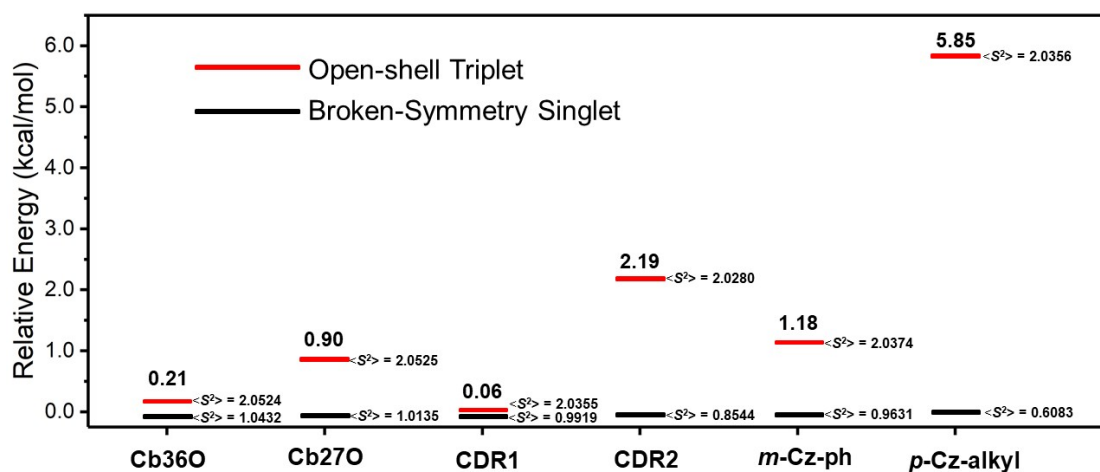

**Figure S19.** Calculated relative energy (kcal/mol) of triplet and broken-symmetry singlet along with spin contamination for oxygen, nitrogen and carbon-centered diradicals with open-shell singlet ground state.

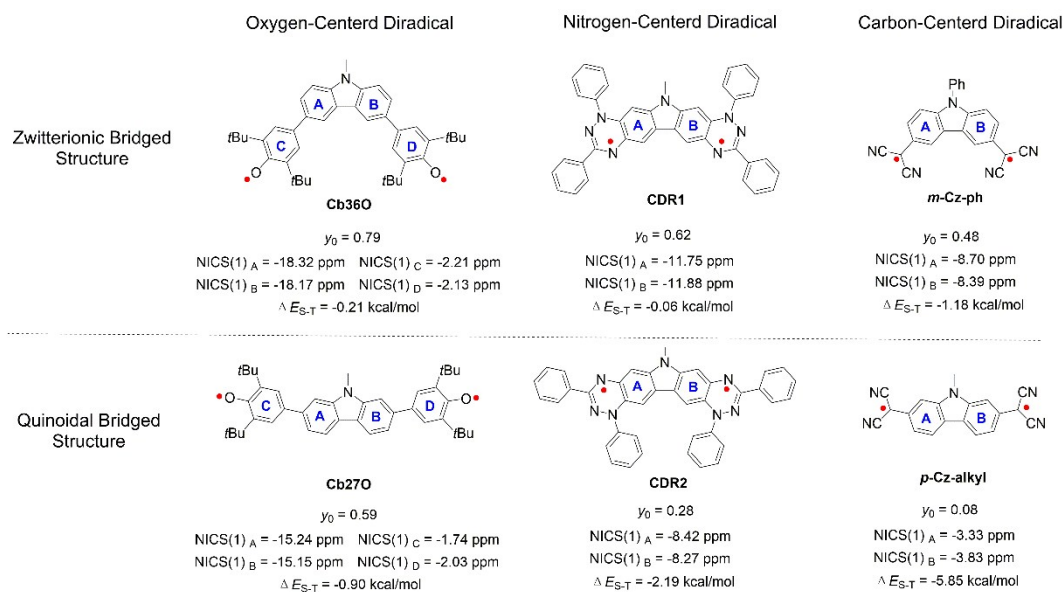

**Figure S20.** The diradical character  $y_0$ , NICS(1)<sub>zz</sub> value (Ring A and Ring B) and calculated singlet-triplet energy gaps ( $\Delta E_{S-T}$ ) of oxygen-centered diradicals (**Cb360** and **Cb270**), nitrogen-centered diradicals (**CDR1** and **CDR2**) and carbon-centered diradicals (**m-Cz-ph** and **p-Cz-alkyl**) at the same level of (U)B3LYP/6-311(d).

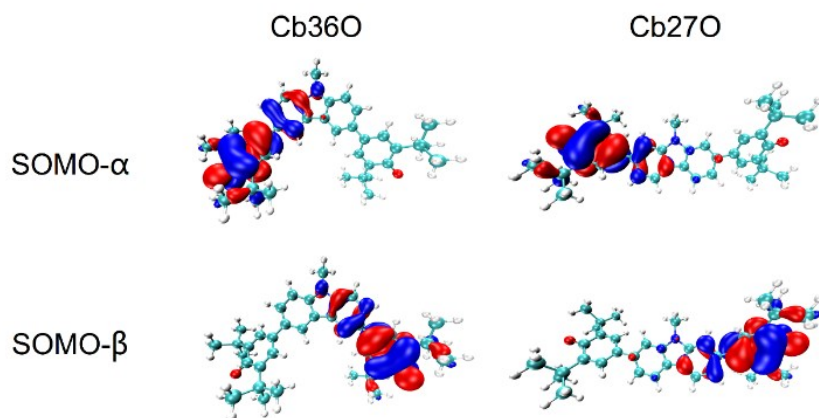

**Figure S21.** The frontier SOMO profiles of Cb360 and Cb270 at the open-shell singlet ground state calculated at the UB3LYP/6-311G(d) level.

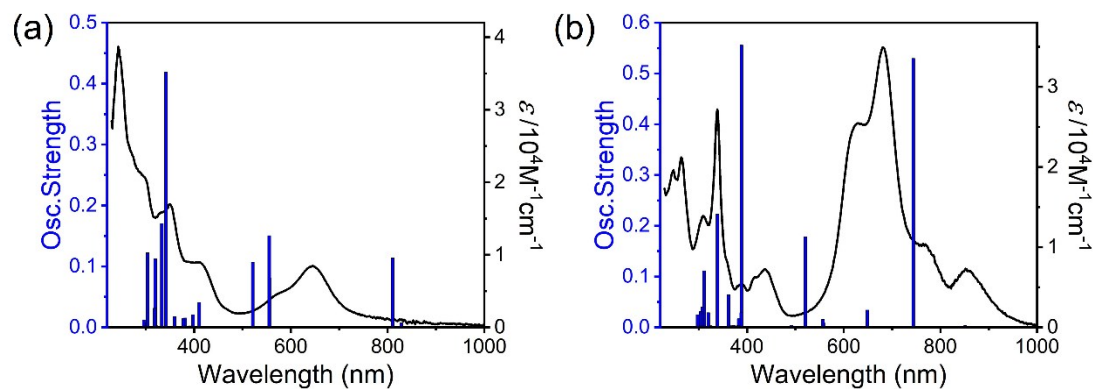

**Figure S22.** TD-DFT simulated spectra of **Cb36O** (a) and **Cb27O** (b) along with experimental spectra.

**Table S6.** Selected TD-DFT calculated energies, oscillator strength and compositions of major electronic transitions of **Cb36O**. The  $\alpha$  and  $\beta$  orbitals are distinguished as A and B in the parenthesis, respectively.

| Wavelength (nm) | Osc. Strength ( <i>f</i> ) | Major contributions                                                                                                |
|-----------------|----------------------------|--------------------------------------------------------------------------------------------------------------------|
| 827.61          | 0.0072                     | HOMO(A)->LUMO(A) (49.9%)<br>HOMO(B)->LUMO(B) (49.0%)                                                               |
| 809.65          | 0.1137                     | HOMO(B)->LUMO(B) (49.8%)<br>HOMO(A)->LUMO(A) (48.8%)                                                               |
| 555.29          | 0.0091                     | HOMO(A)-5->LUMO(A) (53.1%)<br>HOMO(B)-5->LUMO(B) (37.6%)                                                           |
| 555.22          | 0.0814                     | HOMO(B)-5->LUMO(B) (41.0%)<br>HOMO(A)-5->LUMO(A) (37.7%)<br>HOMO(B)-1->LUMO(B) (6.4%)<br>HOMO(A)-1->LUMO(A) (6.3%) |
| 554.92          | 0.1506                     | HOMO(A)-1->LUMO(A) (37.8%)<br>HOMO(B)-1->LUMO(B) (36.7%)<br>HOMO(B)-5->LUMO(B) (14.5%)                             |
| 520.87          | 0.1069                     | HOMO(B)-1->LUMO(B) (40.2%)<br>HOMO(A)-1->LUMO(A) (39.8%)                                                           |



**Table S7.** Selected TD-DFT calculated energies, oscillator strength and compositions of major electronic transitions of **Cb27O**. The  $\alpha$  and  $\beta$  orbitals are distinguished as A and B in the parenthesis, respectively.

| Wavelength (nm) | Osc. Strength ( <i>f</i> ) | Major contributions                                      |
|-----------------|----------------------------|----------------------------------------------------------|
| 850.86          | 0.0013                     | HOMO(A)->LUMO(A) (49.4%)<br>HOMO(B)->LUMO(B) (47.7%)     |
| 743.27          | 0.5298                     | HOMO(B)->LUMO(B) (48.9%)<br>HOMO(A)->LUMO(A) (47.2%)     |
| 651.60          | 0.0021                     | HOMO(A)-1->LUMO(A) (62.3%)<br>HOMO(B)-1->LUMO(B) (35.4%) |
| 648.20          | 0.0340                     | HOMO(B)-1->LUMO(B) (60.7%)<br>HOMO(A)-1->LUMO(A) (33.8%) |
| 557.15          | 0.0087                     | HOMO(A)-5->LUMO(A) (77.1%)<br>HOMO(B)-5->LUMO(B) (18.2%) |
| 556.75          | 0.0158                     | HOMO(B)-5->LUMO(B) (77.0%)<br>HOMO(A)-5->LUMO(A) (18.1%) |

## 12. References

1. Nguyen VN, Kwon Y. Synthesis of poly[n-(2-ethylhexyl)-3,6-carbazole-alt-aniline] copolymer and its potential as hole-transporting material to solid-state dye-sensitized solar cells. *Mol Cryst Liq Cryst*, 2019, 678: 53-61
2. Rausch R, Schmidt D, Bialas D, et al. Stable organic (bi)radicals by delocalization of spin density into the electron-poor chromophore core of isoindigo. *Chem - Eur J*, 2018, 24: 3420-3424
3. Wang D, Capel Ferron C, Li J, et al. New multiresponsive chromic soft materials: Dynamic interconversion of short 2,7-dicyanomethylenecarbazole-based biradicaloid and the corresponding cyclophane tetramer. *Chem - Eur J*, 2017, 23: 13776-13783
4. Gaussian 16 RA, M. J. Frisch, G. W. Trucks, H. B. Schlegel, G. E. Scuseria, M. A. Robb, J. R. Cheeseman, G. Scalmani, V. Barone, G. A. Petersson, H. Nakatsuji, X. Li, M. Caricato, A. V. Marenich, J. Bloino, B. G. Janesko, R. Gomperts, B. Mennucci, H. P. Hratchian, J. V. Ortiz, A. F. Izmaylov, J. L. Sonnenberg, D. Williams-Young, F. Ding, F. Lipparini, F. Egidi, J. Goings, B. Peng, A. Petrone, T. Henderson, D. Ranasinghe, V. G. Zakrzewski, J. Gao, N. Rega, G. Zheng, W. Liang, M. Hada, M. Ehara, K. Toyota, R. Fukuda, J. Hasegawa, M. Ishida, T. Nakajima, Y. Honda, O. Kitao, H. Nakai, T. Vreven, K. Throssell, J. A. Montgomery, Jr., J. E. Peralta, F. Ogliaro, M. J. Bearpark, J. J. Heyd, E. N. Brothers, K. N. Kudin, V. N. Staroverov, T. A. Keith, R. Kobayashi, J. Normand, K. Raghavachari, A. P. Rendell, J. C. Burant, S. S. Iyengar, J. Tomasi, M. Cossi, J. M. Millam, M. Klene, C. Adamo, R. Cammi, J. W. Ochterski, R. L. Martin, K. Morokuma, O. Farkas, J. B. Foresman, and D. J. Fox, Gaussian, Inc., Wallingford CT. 2016,
5. Becke AD. Density-functional thermochemistry. Iii. The role of exact exchange. *J Chem Phys*, 1993, 98: 5648-5652
6. Stephens PJ, Devlin FJ, Chabalowski CF, et al. Ab initio calculation of vibrational absorption and

- circular dichroism spectra using density functional force fields. *J Phys Chem*, 1994, 98: 247-257
7. Lee C, Yang W, Parr RG. Development of the colle-salvetti correlation-energy formula into a functional of the electron density. *Phys Rev B Condens Matter*, 1988, 37: 785-789
  8. Hehre WJ, Ditchfield R, Pople JA. Self-consistent molecular orbital methods. Xii. Further extensions of gaussian-type basis sets for use in molecular orbital studies of organic molecules. *J Chem Phys*, 1972, 56: 2257-2261
  9. Francl M, Pietro WJ, Hehre WJ, et al. Self-consistent molecular orbital methods. Xxiii. A polarization-type basis set for second-row elements. *J Chem Phys*, 1982, 77: 3654-3665
  10. Frisch MJ, Pople JA, Binkley JS. Self-consistent molecular orbital methods 25. Supplementary functions for gaussian basis sets. *J Chem Phys*, 1984, 80: 3265-3269
  11. Nakano M, Kishi R, Nitta T, et al. Second hyperpolarizability ( $\gamma$ ) of singlet diradical system: Dependence of  $\gamma$  on the diradical character. *J Phys Chem A*, 2005, 109: 885-891
  12. Nakano M, Takebe A, Kishi R, et al. Intermolecular interaction effects on the second hyperpolarizability of open-shell singlet diphenalenyl radical dimer. *Chem Phys Lett*, 2008, 454: 97-104
  13. Yamaguchi K, Takahara Y, Fueno T, et al. Ab initio mo calculations of effective exchange integrals between transition-metal ions via oxygen dianions: Nature of the copper-oxygen bonds and superconductivity. *Jpn J Appl Phys*, 1987, 26: L1362-L1364
  14. Lu T, Chen F. Multiwfn: A multifunctional wavefunction analyzer. *J Comput Chem*, 2012, 33: 580-592
  15. Humphrey W, Dalke A, Schulten K. Vmd: Visual molecular dynamics. *J Mol Graph*, 1996, 14: 33-38
  16. Hossein FBS, Wannere CS, Clémence C, et al. Which nics aromaticity index for planar pi rings is best? *Org Lett*, 2006, 8: 863-866

### 13. Coordinates for calculated geometries

#### Cb360 CS

|   |             |            |             |
|---|-------------|------------|-------------|
| C | -3.41653100 | 2.97873900 | 0.13130900  |
| C | -3.06211600 | 1.59667200 | 0.11758700  |
| C | -1.67895800 | 1.27914600 | 0.06857100  |
| C | -0.72877600 | 2.27825400 | 0.02210000  |
| C | -1.12762400 | 3.64409500 | 0.03326900  |
| C | -2.48109000 | 3.99356100 | 0.09734400  |
| C | 1.12432600  | 3.64469900 | -0.06549300 |
| C | 0.72674000  | 2.27865200 | -0.04905500 |
| C | 1.67820200  | 1.28042700 | -0.08861000 |
| C | 3.06131800  | 1.59946300 | -0.12738300 |
| C | 3.41492200  | 2.98168800 | -0.13323600 |
| C | 2.47814100  | 3.99563300 | -0.10747200 |
| N | -0.00247600 | 4.43950800 | -0.03027900 |
| C | -0.00044100 | 5.89164300 | -0.00093600 |

|   |             |             |             |
|---|-------------|-------------|-------------|
| C | -4.06799800 | 0.55591400  | 0.14932700  |
| C | 4.06810300  | 0.55935100  | -0.15242600 |
| C | -3.74864900 | -0.76677600 | 0.57032700  |
| C | -4.66515000 | -1.78094600 | 0.63035400  |
| C | -6.06180400 | -1.50300100 | 0.21640100  |
| C | -6.39757300 | -0.13043700 | -0.23597400 |
| C | -5.41267900 | 0.81932700  | -0.23951000 |
| C | 3.75371000  | -0.76093100 | -0.58441400 |
| C | 4.67098400  | -1.77472800 | -0.63945200 |
| C | 6.06270800  | -1.49893300 | -0.20783300 |
| C | 6.39312600  | -0.12879500 | 0.25569400  |
| C | 5.40818200  | 0.82095000  | 0.25297800  |
| O | -6.92583400 | -2.39331500 | 0.24655200  |
| C | -7.82980400 | 0.17788700  | -0.69528200 |
| C | -8.20416900 | -0.72068500 | -1.89951700 |
| C | 4.30640000  | -3.17845100 | -1.14368100 |
| O | 6.92710000  | -2.38908800 | -0.23266500 |
| C | 7.81993000  | 0.17710500  | 0.73314300  |
| C | 2.82582000  | -3.28153200 | -1.55504200 |
| C | -8.82027800 | -0.07348600 | 0.46866900  |
| C | -7.99476700 | 1.64365800  | -1.13835600 |
| C | -4.29470500 | -3.18737900 | 1.12267900  |
| C | -2.80939200 | -3.29269100 | 1.51600500  |
| C | -5.13684700 | -3.54969000 | 2.37055400  |
| C | -4.55589400 | -4.22261900 | 0.00061100  |
| C | 5.16317100  | -3.53410500 | -2.38349300 |
| C | 4.55437100  | -4.21973600 | -0.02421200 |
| C | 8.18060600  | -0.72806700 | 1.93660800  |
| C | 8.82375800  | -0.06771000 | -0.42072400 |
| C | 7.97955900  | 1.64043400  | 1.18616300  |
| H | -4.45973400 | 3.25391700  | 0.21678500  |
| H | -1.36361200 | 0.24399400  | 0.02616200  |
| H | -2.80296000 | 5.02817400  | 0.13782800  |
| H | 1.36417700  | 0.24490200  | -0.04464300 |
| H | 4.45919400  | 3.25794800  | -0.20014400 |
| H | 2.79991100  | 5.03100300  | -0.12216200 |
| H | -0.90889500 | 6.26853400  | -0.46885900 |
| H | 0.05603900  | 6.26769100  | 1.02446400  |
| H | 0.85175800  | 6.26825700  | -0.56538900 |
| H | -2.73919600 | -0.95829000 | 0.90547800  |
| H | -5.64608800 | 1.81096400  | -0.60033400 |
| H | 2.74813700  | -0.95023500 | -0.93237500 |
| H | 5.63733100  | 1.81070500  | 0.62164900  |
| H | -9.21783800 | -0.48446500 | -2.23846500 |

|   |             |             |             |
|---|-------------|-------------|-------------|
| H | -7.52422100 | -0.55005900 | -2.73988800 |
| H | -8.16719400 | -1.77442700 | -1.63231500 |
| H | 2.61746300  | -4.29679900 | -1.90162600 |
| H | 2.14792800  | -3.08139100 | -0.71966600 |
| H | 2.57275200  | -2.60288700 | -2.37502500 |
| H | -9.83863000 | 0.16870800  | 0.14839600  |
| H | -8.58192600 | 0.56118900  | 1.32783200  |
| H | -8.79693300 | -1.11270200 | 0.78871300  |
| H | -7.35482000 | 1.89610900  | -1.98907400 |
| H | -9.02829500 | 1.81155200  | -1.45156900 |
| H | -7.78506100 | 2.34859100  | -0.32811600 |
| H | -2.59697200 | -4.30987800 | 1.85438900  |
| H | -2.14138900 | -3.08781300 | 0.67383800  |
| H | -2.54668900 | -2.61868300 | 2.33679100  |
| H | -4.85667300 | -4.54414000 | 2.73208200  |
| H | -6.20025100 | -3.55346500 | 2.14164800  |
| H | -4.95737700 | -2.83798000 | 3.18230600  |
| H | -5.60620800 | -4.24238100 | -0.28123200 |
| H | -3.96070600 | -3.99284300 | -0.88859900 |
| H | -4.26937700 | -5.22189200 | 0.34343500  |
| H | 4.88733200  | -4.52662500 | -2.75355900 |
| H | 6.22380500  | -3.53908400 | -2.14211600 |
| H | 4.99320200  | -2.81810400 | -3.19351600 |
| H | 5.60132400  | -4.24119700 | 0.26975200  |
| H | 3.94889000  | -3.99461300 | 0.85922000  |
| H | 4.27175200  | -5.21711200 | -0.37568700 |
| H | 9.19034600  | -0.49374600 | 2.28836100  |
| H | 7.49114200  | -0.56204800 | 2.77012200  |
| H | 8.14671400  | -1.78032200 | 1.66321400  |
| H | 9.83830900  | 0.17294600  | -0.08749500 |
| H | 8.59509000  | 0.57158100  | -1.27909500 |
| H | 8.80437200  | -1.10516900 | -0.74667200 |
| H | 7.32973800  | 1.88818600  | 2.03075300  |
| H | 9.00935700  | 1.80666300  | 1.51228800  |
| H | 7.77921100  | 2.34980400  | 0.37742700  |

**Cb360 T**

|   |             |            |            |
|---|-------------|------------|------------|
| C | -3.41393800 | 2.96130500 | 0.15609400 |
| C | -3.04972600 | 1.59161900 | 0.13796200 |
| C | -1.68415500 | 1.26702400 | 0.07502000 |
| C | -0.72545100 | 2.27307900 | 0.02359300 |
| C | -1.12766000 | 3.63350200 | 0.03948800 |
| C | -2.47781200 | 3.98245000 | 0.11561400 |

|   |             |             |             |
|---|-------------|-------------|-------------|
| C | 1.12240500  | 3.63483900  | -0.07161300 |
| C | 0.72208400  | 2.27391900  | -0.05498100 |
| C | 1.68251600  | 1.26930400  | -0.10127500 |
| C | 3.04827400  | 1.59599000  | -0.14876700 |
| C | 3.41118900  | 2.96606200  | -0.15123200 |
| C | 2.47330800  | 3.98588400  | -0.11702900 |
| N | -0.00394800 | 4.44233400  | -0.03437400 |
| C | -0.00171200 | 5.89029000  | 0.00709300  |
| C | -4.07739500 | 0.54137400  | 0.18894300  |
| C | 4.07739300  | 0.54683500  | -0.19293900 |
| C | -3.81147500 | -0.70098700 | 0.81497800  |
| C | -4.73916200 | -1.71180200 | 0.89370700  |
| C | -6.06872800 | -1.49462700 | 0.28730700  |
| C | -6.34484900 | -0.20255200 | -0.37340800 |
| C | -5.35380400 | 0.74948800  | -0.38850100 |
| C | 3.82004900  | -0.69108000 | -0.83121300 |
| C | 4.74901600  | -1.70111900 | -0.90505900 |
| C | 6.07043200  | -1.48799900 | -0.27974500 |
| C | 6.33742500  | -0.20065200 | 0.39383500  |
| C | 5.34605000  | 0.75112500  | 0.40264900  |
| O | -6.94185400 | -2.38508200 | 0.33269000  |
| C | -7.71346100 | 0.03580400  | -1.02854500 |
| C | -7.95702200 | -1.01251500 | -2.14160000 |
| C | 4.45651500  | -3.02574300 | -1.62527800 |
| O | 6.94439600  | -2.37788900 | -0.32012300 |
| C | 7.69718000  | 0.03326000  | 1.06872900  |
| C | 3.03408400  | -3.06143900 | -2.21529900 |
| C | -8.83168100 | -0.06706400 | 0.03788400  |
| C | -7.81109800 | 1.43151400  | -1.67298500 |
| C | -4.43705000 | -3.04147900 | 1.60054400  |
| C | -3.00710400 | -3.08097500 | 2.17185200  |
| C | -5.41902000 | -3.24819400 | 2.77970700  |
| C | -4.57312600 | -4.21331300 | 0.59733600  |
| C | 5.45372900  | -3.22374500 | -2.79309800 |
| C | 4.58001600  | -4.20474600 | -0.62888200 |
| C | 7.92606400  | -1.02261700 | 2.17775500  |
| C | 8.82950200  | -0.06229600 | 0.01660800  |
| C | 7.78606800  | 1.42455300  | 1.72391800  |
| H | -4.46088600 | 3.22617700  | 0.24619100  |
| H | -1.37669500 | 0.22818100  | 0.03162900  |
| H | -2.79973600 | 5.01685900  | 0.15848500  |
| H | 1.37645900  | 0.22989000  | -0.06135800 |
| H | 4.45943700  | 3.23284900  | -0.21715100 |
| H | 2.79516300  | 5.02118000  | -0.12669800 |

|   |             |             |             |
|---|-------------|-------------|-------------|
| H | -0.91131400 | 6.27276200  | -0.45606500 |
| H | 0.05931300  | 6.26903200  | 1.03265700  |
| H | 0.84622300  | 6.27358100  | -0.56089600 |
| H | -2.84483400 | -0.82813300 | 1.28322300  |
| H | -5.52638500 | 1.68895100  | -0.89574600 |
| H | 2.85954200  | -0.81495200 | -1.31281500 |
| H | 5.51185500  | 1.68692300  | 0.91882200  |
| H | -8.92032400 | -0.82280000 | -2.62535600 |
| H | -7.18136400 | -0.95262500 | -2.91122000 |
| H | -7.96745400 | -2.02275000 | -1.73846800 |
| H | 2.87405500  | -4.02174900 | -2.71173100 |
| H | 2.26252600  | -2.96401100 | -1.44580800 |
| H | 2.87365100  | -2.28043600 | -2.96413100 |
| H | -9.80374800 | 0.13302700  | -0.42372200 |
| H | -8.68315700 | 0.67070700  | 0.83247300  |
| H | -8.86037700 | -1.05752200 | 0.48648700  |
| H | -7.07579000 | 1.57461000  | -2.47008700 |
| H | -8.80043300 | 1.55268500  | -2.12120000 |
| H | -7.68741400 | 2.23633100  | -0.94227800 |
| H | -2.84045200 | -4.04478700 | 2.65923500  |
| H | -2.24556800 | -2.97776900 | 1.39318100  |
| H | -2.83719800 | -2.30535200 | 2.92418200  |
| H | -5.18377000 | -4.18270900 | 3.29860200  |
| H | -6.44905400 | -3.29678400 | 2.43335700  |
| H | -5.33372200 | -2.43438000 | 3.50634800  |
| H | -5.58539200 | -4.28338700 | 0.20559800  |
| H | -3.88247100 | -4.09093900 | -0.24272800 |
| H | -4.32737000 | -5.15695200 | 1.09437600  |
| H | 5.22546300  | -4.15451900 | -3.32174100 |
| H | 6.47919800  | -3.27466000 | -2.43377800 |
| H | 5.37764800  | -2.40470700 | -3.51487900 |
| H | 5.58716500  | -4.27737600 | -0.22462200 |
| H | 3.87851900  | -4.08863300 | 0.20304900  |
| H | 4.34104500  | -5.14483800 | -1.13585200 |
| H | 8.88280100  | -0.83613500 | 2.67559100  |
| H | 7.14021100  | -0.96806500 | 2.93736700  |
| H | 7.94205500  | -2.03007400 | 1.76791300  |
| H | 9.79532700  | 0.13458700  | 0.49247200  |
| H | 8.69152100  | 0.68091500  | -0.77480400 |
| H | 8.86422700  | -1.04965500 | -0.43836100 |
| H | 7.04008400  | 1.56227700  | 2.51199500  |
| H | 8.76926900  | 1.54262100  | 2.18623600  |
| H | 7.67222600  | 2.23432200  | 0.99709300  |

**Cb360 OS**

|   |             |             |             |
|---|-------------|-------------|-------------|
| C | -3.41411897 | 2.96300956  | 0.15633595  |
| C | -3.05047398 | 1.59268257  | 0.13840944  |
| C | -1.68378926 | 1.26853574  | 0.07598975  |
| C | -0.72562770 | 2.27412815  | 0.02398277  |
| C | -1.12768378 | 3.63495795  | 0.03965169  |
| C | -2.47799423 | 3.98379410  | 0.11570947  |
| C | 1.12259924  | 3.63621621  | -0.07173275 |
| C | 0.72236713  | 2.27491958  | -0.05483570 |
| C | 1.68221418  | 1.27070912  | -0.10154809 |
| C | 3.04907129  | 1.59687784  | -0.14907402 |
| C | 3.41148273  | 2.96756531  | -0.15211596 |
| C | 2.47364091  | 3.98707836  | -0.11791511 |
| N | -0.00383223 | 4.44263321  | -0.03414514 |
| C | -0.00155855 | 5.89086898  | 0.00657669  |
| C | -4.07637093 | 0.54239022  | 0.18728798  |
| C | 4.07636151  | 0.54762611  | -0.19116079 |
| C | -3.80566047 | -0.70664476 | 0.79900084  |
| C | -4.73268864 | -1.71766871 | 0.87655825  |
| C | -6.06747680 | -1.49508686 | 0.28338674  |
| C | -6.34866371 | -0.19684994 | -0.36339611 |
| C | -5.35817831 | 0.75532202  | -0.37744254 |
| C | 3.81388693  | -0.69718154 | -0.81491665 |
| C | 4.74215538  | -1.70746262 | -0.88760228 |
| C | 6.06913096  | -1.48869429 | -0.27581716 |
| C | 6.34154310  | -0.19493772 | 0.38359424  |
| C | 5.35072162  | 0.75695866  | 0.39146004  |
| O | -6.94002156 | -2.38578734 | 0.32755224  |
| C | -7.72239885 | 0.04710608  | -1.00570285 |
| C | -7.97414889 | -0.99067282 | -2.12675446 |
| C | 4.44380126  | -3.03867419 | -1.59325426 |
| O | 6.94248451  | -2.37885177 | -0.31502746 |
| C | 7.70675134  | 0.04480505  | 1.04539782  |
| C | 3.01661510  | -3.07984572 | -2.17129591 |
| C | -8.83229738 | -0.06644978 | 0.06829471  |
| C | -7.82565916 | 1.44881342  | -1.63608206 |
| C | -4.42509614 | -3.05367213 | 1.56908438  |
| C | -2.99066655 | -3.09846455 | 2.12862663  |
| C | -5.39763286 | -3.27089435 | 2.75411607  |
| C | -4.56930515 | -4.21647610 | 0.55655908  |
| C | 5.43141676  | -3.24741034 | -2.76729904 |
| C | 4.57548921  | -4.20849621 | -0.58714263 |
| C | 7.94425064  | -1.00079314 | 2.16229054  |
| C | 8.83057015  | -0.06090433 | -0.01482851 |

|   |             |             |             |
|---|-------------|-------------|-------------|
| C | 7.80134797  | 1.44206372  | 1.68692498  |
| H | -4.46076974 | 3.22849911  | 0.24695515  |
| H | -1.37585794 | 0.22990341  | 0.03273163  |
| H | -2.79990820 | 5.01820968  | 0.15878022  |
| H | 1.37567176  | 0.23152796  | -0.06125885 |
| H | 4.45942936  | 3.23489181  | -0.21910634 |
| H | 2.79552037  | 5.02237060  | -0.12846651 |
| H | -0.91129833 | 6.27305714  | -0.45641355 |
| H | 0.05970585  | 6.26939142  | 1.03210871  |
| H | 0.84637333  | 6.27375930  | -0.56158793 |
| H | -2.83556931 | -0.83878877 | 1.25849295  |
| H | -5.53540813 | 1.69906576  | -0.87490240 |
| H | 2.84969870  | -0.82619685 | -1.28758719 |
| H | 5.52140991  | 1.69721998  | 0.89769751  |
| H | -8.94132710 | -0.79696951 | -2.60111455 |
| H | -7.20458367 | -0.92295679 | -2.90183039 |
| H | -7.98084616 | -2.00471979 | -1.73322771 |
| H | 2.85257136  | -4.04473544 | -2.65743659 |
| H | 2.25133292  | -2.97529159 | -1.39646718 |
| H | 2.85003185  | -2.30588117 | -2.92608602 |
| H | -9.80802450 | 0.13738899  | -0.38386791 |
| H | -8.67800057 | 0.66388906  | 0.86863115  |
| H | -8.85697980 | -1.06109983 | 0.50777119  |
| H | -7.09660241 | 1.59987049  | -2.43745921 |
| H | -8.81848247 | 1.57370817  | -2.07548003 |
| H | -7.69674963 | 2.24674088  | -0.89874064 |
| H | -2.82027477 | -4.06665707 | 2.60593497  |
| H | -2.23530688 | -2.98834413 | 1.34488036  |
| H | -2.81465649 | -2.32971745 | 2.88660513  |
| H | -5.15860528 | -4.21016624 | 3.26260165  |
| H | -6.43042196 | -3.31603744 | 2.41559339  |
| H | -5.30626232 | -2.46374383 | 3.48742754  |
| H | -5.58464437 | -4.28289805 | 0.17220194  |
| H | -3.88529821 | -4.08665235 | -0.28781986 |
| H | -4.31982569 | -5.16458489 | 1.04314536  |
| H | 5.19914037  | -4.18314430 | -3.28534260 |
| H | 6.45981850  | -3.29472161 | -2.41595131 |
| H | 5.34918192  | -2.43516175 | -3.49604907 |
| H | 5.58589249  | -4.27738263 | -0.19041684 |
| H | 3.88078038  | -4.08473956 | 0.24937411  |
| H | 4.33249460  | -5.15322908 | -1.08347608 |
| H | 8.90510598  | -0.81019785 | 2.65055336  |
| H | 7.16463889  | -0.93876478 | 2.92774437  |
| H | 7.95643892  | -2.01203440 | 1.76173868  |



|   |            |             |             |
|---|------------|-------------|-------------|
| H | 9.80025946 | 0.14000804  | 0.45141061  |
| H | 8.68644449 | 0.67500045  | -0.81195632 |
| H | 8.86131238 | -1.05243815 | -0.46091015 |
| H | 7.06183012 | 1.58735043  | 2.47973901  |
| H | 8.78829883 | 1.56406418  | 2.14014972  |
| H | 7.68188128 | 2.24512670  | 0.95357732  |

### Cb27O CS

|   |             |             |             |
|---|-------------|-------------|-------------|
| C | -3.45784300 | -0.66950900 | -0.04665400 |
| C | -3.01390700 | -2.04045100 | -0.03423200 |
| C | -1.69079100 | -2.38869200 | -0.04668900 |
| C | -0.70135800 | -1.37846800 | -0.05673200 |
| C | -1.12822200 | -0.00672500 | -0.07538100 |
| C | -2.45687800 | 0.34643600  | -0.06795300 |
| C | 1.12864200  | -0.00552400 | -0.04202000 |
| C | 0.70298700  | -1.37775900 | -0.04154300 |
| C | 1.69321800  | -2.38712300 | -0.02741500 |
| C | 3.01609700  | -2.03776200 | -0.02161400 |
| C | 3.45843400  | -0.66632200 | -0.00679800 |
| C | 2.45650400  | 0.34874700  | -0.01096900 |
| N | 0.00010700  | 0.80210600  | -0.08664100 |
| C | -0.00147500 | 2.24994400  | -0.06424800 |
| C | -4.85303700 | -0.34668900 | -0.04316000 |
| C | 4.85318500  | -0.34264500 | 0.02299300  |
| C | -5.31272700 | 0.96774300  | -0.37415400 |
| C | -6.62767200 | 1.32837600  | -0.38815600 |
| C | -7.64951600 | 0.31407900  | -0.01838100 |
| C | -7.18424000 | -1.05206700 | 0.33241300  |
| C | -5.84705900 | -1.31933800 | 0.29505400  |
| C | 5.85484900  | -1.31507300 | -0.29251200 |
| C | 7.19247800  | -1.04747800 | -0.29948500 |
| C | 7.64926100  | 0.31867000  | 0.06221000  |
| C | 6.61902100  | 1.33262800  | 0.40898600  |
| C | 5.30474500  | 0.97196400  | 0.36422900  |
| O | -8.85336700 | 0.60064500  | -0.00554200 |
| C | -8.21898600 | -2.11437600 | 0.73333700  |
| C | -8.99772300 | -1.64784800 | 1.98752200  |
| C | 8.23629300  | -2.10940500 | -0.67722500 |
| O | 8.85301100  | 0.60555300  | 0.07678200  |
| C | 7.06639600  | 2.74484800  | 0.81473700  |
| C | 7.58712100  | -3.46126200 | -1.02800900 |
| C | -9.20747700 | -2.35239500 | -0.43478400 |
| C | -7.56177300 | -3.46621000 | 1.06898500  |

|   |             |             |             |
|---|-------------|-------------|-------------|
| C | -7.08436000 | 2.74081100  | -0.78261200 |
| C | -5.89797400 | 3.65396200  | -1.14415700 |
| C | -8.01433200 | 2.67040000  | -2.01852100 |
| C | -7.83780400 | 3.39918000  | 0.39941000  |
| C | 9.04298500  | -1.64231900 | -1.91340800 |
| C | 9.19826700  | -2.34748300 | 0.51281900  |
| C | 7.96815800  | 2.67353800  | 2.07133900  |
| C | 7.84633900  | 3.40426300  | -0.34936800 |
| C | 5.87199200  | 3.65753400  | 1.15010400  |
| H | -3.75007100 | -2.83191800 | -0.05812700 |
| H | -1.40436800 | -3.43517900 | -0.05273100 |
| H | -2.74103300 | 1.38860400  | -0.02502500 |
| H | 1.40751500  | -3.43372000 | -0.01288900 |
| H | 3.75240800  | -2.82827100 | 0.02195300  |
| H | 2.74049000  | 1.39168600  | -0.02894400 |
| H | -0.87787300 | 2.62435100  | -0.59355500 |
| H | -0.00973100 | 2.64401700  | 0.95729900  |
| H | 0.88130000  | 2.62736300  | -0.58080400 |
| H | -4.57446700 | 1.69684000  | -0.67378700 |
| H | -5.51097100 | -2.30434400 | 0.58176700  |
| H | 5.52539300  | -2.30001000 | -0.58714600 |
| H | 4.55978100  | 1.70099900  | 0.64699200  |
| H | -9.71802400 | -2.41651800 | 2.28475200  |
| H | -8.31882600 | -1.48504500 | 2.83028400  |
| H | -9.54015000 | -0.72457100 | 1.79630800  |
| H | 8.36876300  | -4.18046300 | -1.28508300 |
| H | 7.02534300  | -3.88270200 | -0.18888900 |
| H | 6.91789500  | -3.39091300 | -1.89068900 |
| H | -9.92891700 | -3.12775700 | -0.15832500 |
| H | -8.67888000 | -2.69425900 | -1.32999200 |
| H | -9.75483000 | -1.44535800 | -0.68120800 |
| H | -6.87338100 | -3.39610800 | 1.91647700  |
| H | -8.33730200 | -4.18568800 | 1.34322600  |
| H | -7.01888500 | -3.88720400 | 0.21730200  |
| H | -6.27420800 | 4.64373600  | -1.41445500 |
| H | -5.20817100 | 3.78976400  | -0.30546600 |
| H | -5.33057600 | 3.27961800  | -2.00155400 |
| H | -8.31944100 | 3.67979500  | -2.31189300 |
| H | -8.90901800 | 2.08877800  | -1.80794000 |
| H | -7.49754000 | 2.21841900  | -2.87073700 |
| H | -7.19469600 | 3.46860100  | 1.28222700  |
| H | -8.13984900 | 4.41542900  | 0.12717200  |
| H | -8.72884100 | 2.83443100  | 0.66402900  |
| H | 9.77009000  | -2.41066800 | -2.19446100 |

|   |            |             |             |
|---|------------|-------------|-------------|
| H | 9.58064700 | -0.71889700 | -1.70980400 |
| H | 8.38323000 | -1.47959200 | -2.77125700 |
| H | 8.64965800 | -2.68927700 | 1.39592800  |
| H | 9.92563000 | -3.12293900 | 0.25264200  |
| H | 9.74004200 | -1.44050000 | 0.77146900  |
| H | 8.26621700 | 3.68275800  | 2.37243900  |
| H | 7.43231300 | 2.22065700  | 2.91121500  |
| H | 8.86754000 | 2.09233500  | 1.88053900  |
| H | 8.14202800 | 4.42031400  | -0.06952200 |
| H | 7.22336200 | 3.47439500  | -1.24645700 |
| H | 8.74320200 | 2.83982200  | -0.59423800 |
| H | 5.28505500 | 3.28240000  | 1.99385200  |
| H | 6.24190200 | 4.64706700  | 1.42985500  |
| H | 5.20144700 | 3.79417800  | 0.29606900  |

### **Cb27O T**

|   |             |             |             |
|---|-------------|-------------|-------------|
| C | -3.44623000 | -0.69519000 | -0.06531500 |
| C | -3.03399500 | -2.05166900 | -0.05025800 |
| C | -1.69571700 | -2.40572400 | -0.04757300 |
| C | -0.71883900 | -1.40488500 | -0.04977200 |
| C | -1.12675100 | -0.04427100 | -0.07097300 |
| C | -2.47077800 | 0.31576200  | -0.07664400 |
| C | 1.12762600  | -0.04285200 | -0.02802000 |
| C | 0.72107200  | -1.40401900 | -0.02687600 |
| C | 1.69884400  | -2.40378900 | -0.00686900 |
| C | 3.03664200  | -2.04819700 | 0.00817600  |
| C | 3.44703600  | -0.69112900 | 0.01968600  |
| C | 2.47067300  | 0.31873900  | 0.00685900  |
| N | 0.00037800  | 0.76645200  | -0.07603000 |
| C | -0.00122700 | 2.21374900  | -0.04452400 |
| C | -4.87692200 | -0.34896800 | -0.06602700 |
| C | 4.87724100  | -0.34372400 | 0.04881600  |
| C | -5.33970800 | 0.80919300  | -0.73656500 |
| C | -6.66452300 | 1.17367000  | -0.76891900 |
| C | -7.64385300 | 0.32358500  | -0.06057500 |
| C | -7.16109600 | -0.88184200 | 0.64434100  |
| C | -5.81686400 | -1.16711200 | 0.60596400  |
| C | 5.83033900  | -1.16262300 | -0.60331400 |
| C | 7.17489800  | -0.87646000 | -0.61647800 |
| C | 7.64315400  | 0.33065200  | 0.09520800  |
| C | 6.64994500  | 1.18102300  | 0.78359500  |
| C | 5.32612900  | 0.81583600  | 0.72625500  |
| O | -8.85630000 | 0.61825500  | -0.05896400 |

|   |             |             |             |
|---|-------------|-------------|-------------|
| C | -8.16051800 | -1.76870300 | 1.40108800  |
| C | -8.86325100 | -0.94673500 | 2.50930000  |
| C | 8.18926500  | -1.76410300 | -1.35214100 |
| O | 8.85516900  | 0.62649800  | 0.11578300  |
| C | 7.11938100  | 2.42819600  | 1.54671300  |
| C | 7.51391200  | -2.96686100 | -2.03779700 |
| C | -9.21750100 | -2.32800800 | 0.41700800  |
| C | -7.47119400 | -2.96926400 | 2.07663100  |
| C | -7.14919900 | 2.41960500  | -1.52448700 |
| C | -5.98856700 | 3.17257000  | -2.20191400 |
| C | -8.15152900 | 2.00953400  | -2.63118800 |
| C | -7.83222200 | 3.40030800  | -0.53964600 |
| C | 8.91213600  | -0.94407900 | -2.44878800 |
| C | 9.22793600  | -2.32013300 | -0.34693000 |
| C | 8.10087900  | 2.02018400  | 2.67269100  |
| C | 7.82033300  | 3.40813100  | 0.57377000  |
| C | 5.94569300  | 3.18116300  | 2.20122200  |
| H | -3.78505700 | -2.83189600 | -0.07913400 |
| H | -1.41209400 | -3.45327000 | -0.04685700 |
| H | -2.76898000 | 1.35642400  | -0.04050800 |
| H | 1.41619500  | -3.45153000 | 0.00489600  |
| H | 3.78809900  | -2.82711200 | 0.05654900  |
| H | 2.76816900  | 1.36009700  | -0.01081000 |
| H | -0.87534900 | 2.59256200  | -0.57461800 |
| H | -0.01396800 | 2.60245400  | 0.97935700  |
| H | 0.88379700  | 2.59511700  | -0.55450200 |
| H | -4.61084300 | 1.39808400  | -1.27674600 |
| H | -5.43810500 | -2.02756700 | 1.14022800  |
| H | 5.46228000  | -2.02442200 | -1.14292500 |
| H | 4.58669300  | 1.40514200  | 1.25145800  |
| H | -9.55255000 | -1.58916500 | 3.06600100  |
| H | -8.13434300 | -0.54682100 | 3.22083600  |
| H | -9.42872100 | -0.11758300 | 2.08979600  |
| H | 8.27482100  | -3.56692600 | -2.54294600 |
| H | 7.00807600  | -3.62270500 | -1.32317500 |
| H | 6.78813300  | -2.66050700 | -2.79658800 |
| H | -9.91018700 | -2.98505100 | 0.95208900  |
| H | -8.74276600 | -2.91855500 | -0.37259800 |
| H | -9.79018400 | -1.52770300 | -0.04628500 |
| H | -6.73133800 | -2.66052900 | 2.82072200  |
| H | -8.22183300 | -3.56871000 | 2.59762600  |
| H | -6.97854700 | -3.62642300 | 1.35404300  |
| H | -6.38275600 | 4.04933200  | -2.72164800 |
| H | -5.24906700 | 3.53136100  | -1.47971400 |

|   |             |             |             |
|---|-------------|-------------|-------------|
| H | -5.47310000 | 2.56005300  | -2.94725800 |
| H | -8.47343000 | 2.89583600  | -3.18676800 |
| H | -9.03190300 | 1.52924400  | -2.20987100 |
| H | -7.68683300 | 1.32139100  | -3.34389700 |
| H | -7.13897400 | 3.70877700  | 0.24904300  |
| H | -8.14926500 | 4.30119300  | -1.07419600 |
| H | -8.70631200 | 2.94988700  | -0.07482700 |
| H | 9.61220600  | -1.58724700 | -2.99101200 |
| H | 9.46907300  | -0.11359000 | -2.02060600 |
| H | 8.19645400  | -0.54627800 | -3.17479000 |
| H | 8.73891800  | -2.90954100 | 0.43476700  |
| H | 9.93139800  | -2.97753700 | -0.86731100 |
| H | 9.79085700  | -1.51821400 | 0.12546100  |
| H | 8.41151500  | 2.90739900  | 3.23320500  |
| H | 7.62325800  | 1.33256700  | 3.37731800  |
| H | 8.98945000  | 1.54006900  | 2.26875300  |
| H | 8.12673500  | 4.30981500  | 1.11315200  |
| H | 7.14189400  | 3.71529400  | -0.22820000 |
| H | 8.70328100  | 2.95767000  | 0.12604000  |
| H | 5.41651900  | 2.56911300  | 2.93727700  |
| H | 6.32953000  | 4.05863700  | 2.72747400  |
| H | 5.21966300  | 3.53881900  | 1.46495700  |

### **Cb270 OS**

|   |             |             |             |
|---|-------------|-------------|-------------|
| C | -3.44801726 | -0.69241851 | -0.06309511 |
| C | -3.03100064 | -2.05084492 | -0.04764361 |
| C | -1.69489016 | -2.40417626 | -0.04755027 |
| C | -0.71626123 | -1.40211093 | -0.05109576 |
| C | -1.12686383 | -0.04005521 | -0.07252524 |
| C | -2.46873725 | 0.31887157  | -0.07653480 |
| C | 1.12773188  | -0.03865566 | -0.02824244 |
| C | 0.71845098  | -1.40126524 | -0.02814663 |
| C | 1.69793722  | -2.40232653 | -0.00956271 |
| C | 3.03361428  | -2.04756994 | 0.00369782  |
| C | 3.44881814  | -0.68856897 | 0.01679714  |
| C | 2.46865619  | 0.32169906  | 0.00624711  |
| N | 0.00038772  | 0.77040283  | -0.07696179 |
| C | -0.00137663 | 2.21778497  | -0.04609140 |
| C | -4.87354981 | -0.34984731 | -0.06435973 |
| C | 4.87385266  | -0.34486212 | 0.04706871  |
| C | -5.33239150 | 0.84548925  | -0.67447690 |
| C | -6.65545649 | 1.21032702  | -0.70374964 |
| C | -7.64437367 | 0.32354545  | -0.05384547 |

|   |             |             |             |
|---|-------------|-------------|-------------|
| C | -7.16830227 | -0.92063654 | 0.58730752  |
| C | -5.82540684 | -1.20442636 | 0.54761414  |
| C | 5.83781684  | -1.19976622 | -0.54505309 |
| C | 7.18106074  | -0.91508819 | -0.55922089 |
| C | 7.64373348  | 0.33029478  | 0.08928295  |
| C | 6.64194639  | 1.21689636  | 0.71944807  |
| C | 5.31982169  | 0.85142381  | 0.66472024  |
| O | -8.85509111 | 0.61911990  | -0.04813789 |
| C | -8.17671868 | -1.84708539 | 1.28271672  |
| C | -8.88964882 | -1.08765242 | 2.42825532  |
| C | 8.20337673  | -1.84175965 | -1.23374212 |
| O | 8.85408149  | 0.62707711  | 0.10592828  |
| C | 7.10450810  | 2.50248986  | 1.42097368  |
| C | 7.53596118  | -3.08167909 | -1.85815977 |
| C | -9.22426257 | -2.34773088 | 0.25786924  |
| C | -7.49639058 | -3.08545713 | 1.89617844  |
| C | -7.13216312 | 2.49523464  | -1.39701580 |
| C | -5.96474244 | 3.28250970  | -2.02153694 |
| C | -8.12321193 | 2.14607144  | -2.53420570 |
| C | -7.82482174 | 3.42238929  | -0.36802334 |
| C | 8.93750184  | -1.08353367 | -2.36661540 |
| C | 9.23145028  | -2.33988186 | -0.18814822 |
| C | 8.07425685  | 2.15462793  | 2.57679425  |
| C | 7.81571143  | 3.42968045  | 0.40475910  |
| C | 5.92495185  | 3.28911308  | 2.02311444  |
| H | -3.77949713 | -2.83302879 | -0.07745580 |
| H | -1.41102929 | -3.45161228 | -0.04822978 |
| H | -2.76441584 | 1.35981446  | -0.03760305 |
| H | 1.41497888  | -3.44993046 | 0.00277502  |
| H | 3.78244068  | -2.82850054 | 0.05274698  |
| H | 2.76383000  | 1.36334501  | -0.01320208 |
| H | -0.87513939 | 2.59611814  | -0.57709999 |
| H | -0.01489182 | 2.60675358  | 0.97762584  |
| H | 0.88394075  | 2.59894699  | -0.55567460 |
| H | -4.60007191 | 1.46439456  | -1.17445878 |
| H | -5.45610944 | -2.09342445 | 1.03953109  |
| H | 5.47846575  | -2.08971475 | -1.04264297 |
| H | 4.57759980  | 1.47038932  | 1.14987549  |
| H | -9.58653281 | -1.75854037 | 2.94020149  |
| H | -8.16758757 | -0.73083111 | 3.16910659  |
| H | -9.44862721 | -0.23439425 | 2.05044033  |
| H | 8.30255222  | -3.70869920 | -2.32018842 |
| H | 7.02237540  | -3.69669647 | -1.11330925 |
| H | 6.81871836  | -2.81927653 | -2.64122778 |

|   |             |             |             |
|---|-------------|-------------|-------------|
| H | -9.92411139 | -3.03179436 | 0.74790330  |
| H | -8.74232968 | -2.89448715 | -0.55847948 |
| H | -9.79031315 | -1.52125758 | -0.16594899 |
| H | -6.76446351 | -2.82121640 | 2.66490957  |
| H | -8.25343452 | -3.71236263 | 2.37382871  |
| H | -6.99670200 | -3.70125828 | 1.14257034  |
| H | -6.35371994 | 4.18543332  | -2.49867816 |
| H | -5.23302820 | 3.60288171  | -1.27372651 |
| H | -5.44133222 | 2.70977947  | -2.79262240 |
| H | -8.43956457 | 3.06121288  | -3.04440405 |
| H | -9.00785357 | 1.64432158  | -2.14839202 |
| H | -7.65134151 | 1.49708957  | -3.27828322 |
| H | -7.13936326 | 3.68760990  | 0.44289580  |
| H | -8.13644644 | 4.35090381  | -0.85657047 |
| H | -8.70356591 | 2.94830780  | 0.06329479  |
| H | 9.64464029  | -1.75461786 | -2.86404179 |
| H | 9.48839769  | -0.22916454 | -1.97955872 |
| H | 8.22946353  | -0.72856174 | -3.12175183 |
| H | 8.73437684  | -2.88573530 | 0.61968275  |
| H | 9.94114396  | -3.02415506 | -0.66350481 |
| H | 9.78859798  | -1.51227456 | 0.24515750  |
| H | 8.37988322  | 3.07024523  | 3.09264823  |
| H | 7.58907232  | 1.50534193  | 3.31198877  |
| H | 8.96656785  | 1.65372261  | 2.20793425  |
| H | 8.11755889  | 4.35858573  | 0.89866886  |
| H | 7.14533503  | 3.69415027  | -0.41891964 |
| H | 8.70264758  | 2.95597770  | -0.00989119 |
| H | 5.38744837  | 2.71632408  | 2.78438829  |
| H | 6.30427108  | 4.19246148  | 2.50718237  |
| H | 5.20710125  | 3.60872981  | 1.26169547  |

#### CDR1 CS

|   |             |             |            |
|---|-------------|-------------|------------|
| C | -3.43672200 | -1.48935000 | 0.21268600 |
| C | -3.01172800 | -0.09242500 | 0.11631900 |
| C | -1.67753400 | 0.24834800  | 0.08147200 |
| C | -0.69983900 | -0.76777000 | 0.20636500 |
| C | -1.12523900 | -2.13811900 | 0.36750400 |
| C | -2.44560300 | -2.50100400 | 0.36649200 |
| C | 0.69982800  | -0.76775800 | 0.20636400 |
| C | 1.12523800  | -2.13809700 | 0.36750700 |
| N | 0.00001200  | -2.93886800 | 0.49150000 |
| C | 1.67752400  | 0.24835800  | 0.08147000 |
| C | 3.01172000  | -0.09242100 | 0.11632000 |

|   |             |             |             |
|---|-------------|-------------|-------------|
| C | 3.43671900  | -1.48934600 | 0.21269200  |
| C | 2.44559600  | -2.50099900 | 0.36650300  |
| N | 4.07001400  | 0.81678800  | 0.04732600  |
| N | 5.36304100  | 0.43272300  | -0.10982800 |
| C | 5.62636800  | -0.85053500 | -0.06478500 |
| N | 4.70964300  | -1.84206100 | 0.13369000  |
| N | -4.70964600 | -1.84206800 | 0.13368300  |
| C | -5.62637400 | -0.85054400 | -0.06478500 |
| N | -5.36305000 | 0.43271500  | -0.10982700 |
| N | -4.07002400 | 0.81678300  | 0.04732400  |
| C | 3.88308400  | 2.23461000  | 0.05273200  |
| C | 7.04549800  | -1.25424300 | -0.22837400 |
| C | -3.88309500 | 2.23460500  | 0.05272500  |
| C | -7.04550500 | -1.25425300 | -0.22837000 |
| C | 7.38927200  | -2.61190500 | -0.23683600 |
| C | 8.71628900  | -3.00291600 | -0.39309500 |
| C | 9.71805200  | -2.04675200 | -0.54104900 |
| C | 9.38336500  | -0.69197700 | -0.53082200 |
| C | 8.06020900  | -0.29710200 | -0.37611600 |
| C | 4.49037800  | 3.00842700  | -0.93821600 |
| C | 4.34452700  | 4.39181300  | -0.91941900 |
| C | 3.59636100  | 5.00862700  | 0.08173100  |
| C | 3.00018600  | 4.23229400  | 1.07426500  |
| C | 3.14218800  | 2.84805500  | 1.06580400  |
| C | -3.14219600 | 2.84805300  | 1.06579300  |
| C | -3.00019300 | 4.23229200  | 1.07424900  |
| C | -3.59637200 | 5.00862200  | 0.08171600  |
| C | -4.34454200 | 4.39180400  | -0.91943000 |
| C | -4.49039300 | 3.00841900  | -0.93822300 |
| C | -8.06021700 | -0.29711300 | -0.37610400 |
| C | -9.38337300 | -0.69198900 | -0.53080500 |
| C | -9.71805800 | -2.04676400 | -0.54103700 |
| C | -8.71629300 | -3.00292800 | -0.39309100 |
| C | -7.38927600 | -2.61191600 | -0.23683600 |
| C | 0.00012000  | -4.38264000 | 0.60206400  |
| H | -1.37165900 | 1.27883600  | -0.03949300 |
| H | -2.78958000 | -3.52467200 | 0.44001200  |
| H | 1.37165600  | 1.27884700  | -0.03950000 |
| H | 2.78954500  | -3.52467700 | 0.44003600  |
| H | 6.60517800  | -3.34867100 | -0.11865800 |
| H | 8.96743100  | -4.05902300 | -0.39857800 |
| H | 10.75258600 | -2.35253200 | -0.66178700 |
| H | 10.15854600 | 0.05979200  | -0.64220500 |
| H | 7.79968100  | 0.75405500  | -0.36305100 |



|   |              |             |             |
|---|--------------|-------------|-------------|
| H | 5.07726600   | 2.51885100  | -1.70529900 |
| H | 4.81589200   | 4.98898500  | -1.69304700 |
| H | 3.48430400   | 6.08762300  | 0.09282800  |
| H | 2.43219200   | 4.70548400  | 1.86855500  |
| H | 2.69832300   | 2.24609300  | 1.84992400  |
| H | -2.69832800  | 2.24609300  | 1.84991300  |
| H | -2.43219700  | 4.70548400  | 1.86853600  |
| H | -3.48431600  | 6.08761800  | 0.09280800  |
| H | -4.81591000  | 4.98897400  | -1.69305800 |
| H | -5.07728400  | 2.51884000  | -1.70530200 |
| H | -7.79969100  | 0.75404400  | -0.36303500 |
| H | -10.15855500 | 0.05977900  | -0.64218200 |
| H | -10.75259200 | -2.35254500 | -0.66177100 |
| H | -8.96743500  | -4.05903500 | -0.39857700 |
| H | -6.60518200  | -3.34868200 | -0.11866500 |
| H | 0.88070200   | -4.70700100 | 1.15669200  |
| H | -0.88136800  | -4.70721500 | 1.15509700  |
| H | 0.00106300   | -4.86820500 | -0.37954000 |

#### **CDR1 T**

|   |             |             |             |
|---|-------------|-------------|-------------|
| C | -3.43982900 | -1.50068700 | 0.21163300  |
| C | -3.02996300 | -0.12858400 | 0.11916400  |
| C | -1.67686300 | 0.21751500  | 0.07979400  |
| C | -0.72161600 | -0.78956200 | 0.19168500  |
| C | -1.12955000 | -2.14815700 | 0.33935400  |
| C | -2.46730700 | -2.50671500 | 0.33572100  |
| C | 0.72156400  | -0.78953100 | 0.19175600  |
| C | 1.12951000  | -2.14814000 | 0.33944900  |
| N | -0.00000900 | -2.94587200 | 0.45135600  |
| C | 1.67682700  | 0.21752400  | 0.07996300  |
| C | 3.02992400  | -0.12859900 | 0.11947900  |
| C | 3.43978500  | -1.50069300 | 0.21192900  |
| C | 2.46723100  | -2.50672100 | 0.33595700  |
| N | 4.06801100  | 0.80236000  | 0.03666000  |
| N | 5.36697800  | 0.43615000  | -0.12542900 |
| C | 5.63382400  | -0.87046200 | -0.05794200 |
| N | 4.75667800  | -1.85363700 | 0.14742400  |
| N | -4.75673500 | -1.85360600 | 0.14714000  |
| C | -5.63390100 | -0.87041900 | -0.05796400 |
| N | -5.36705900 | 0.43619600  | -0.12555100 |
| N | -4.06802600 | 0.80236700  | 0.03615300  |
| C | 3.86019600  | 2.21724300  | 0.05039600  |
| C | 7.06687900  | -1.23952500 | -0.21627600 |

|   |              |             |             |
|---|--------------|-------------|-------------|
| C | -3.86011200  | 2.21724200  | 0.04931100  |
| C | -7.06701600  | -1.23942800 | -0.21588900 |
| C | 7.44021700   | -2.58935000 | -0.22680700 |
| C | 8.77535800   | -2.95040200 | -0.37622200 |
| C | 9.75651500   | -1.97035700 | -0.51640900 |
| C | 9.39274900   | -0.62427700 | -0.50470800 |
| C | 8.05906000   | -0.25933900 | -0.35557400 |
| C | 4.44689200   | 3.00217100  | -0.94423400 |
| C | 4.27794400   | 4.38248800  | -0.92099400 |
| C | 3.52981200   | 4.98490600  | 0.08957600  |
| C | 2.95755100   | 4.19793100  | 1.08714200  |
| C | 3.12281700   | 2.81577300  | 1.07458200  |
| C | -3.12324400  | 2.81622100  | 1.07359300  |
| C | -2.95782500  | 4.19836700  | 1.08552600  |
| C | -3.52943200  | 4.98488600  | 0.08722300  |
| C | -4.27707400  | 4.38202400  | -0.92344300 |
| C | -4.44615900  | 3.00171100  | -0.94605600 |
| C | -8.05937000  | -0.25917200 | -0.35344700 |
| C | -9.39311700  | -0.62406400 | -0.50218400 |
| C | -9.75676000  | -1.97016500 | -0.51525400 |
| C | -8.77542500  | -2.95028100 | -0.37682300 |
| C | -7.44023100  | -2.58927500 | -0.22777100 |
| C | 0.00018400   | -4.38977000 | 0.55503200  |
| H | -1.37526200  | 1.24884200  | -0.04768100 |
| H | -2.81106200  | -3.53171700 | 0.39655500  |
| H | 1.37526600   | 1.24886700  | -0.04748100 |
| H | 2.81093400   | -3.53174400 | 0.39678600  |
| H | 6.66962200   | -3.34150900 | -0.11554500 |
| H | 9.05082000   | -4.00039300 | -0.38346300 |
| H | 10.79821000  | -2.25303700 | -0.63247000 |
| H | 10.15174500  | 0.14467600  | -0.60986300 |
| H | 7.77428900   | 0.78513500  | -0.33999600 |
| H | 5.03465300   | 2.52246100  | -1.71672500 |
| H | 4.73170100   | 4.98923500  | -1.69761800 |
| H | 3.40123100   | 6.06200400  | 0.10449400  |
| H | 2.39191100   | 4.66050300  | 1.88924900  |
| H | 2.70303800   | 2.20539900  | 1.86559200  |
| H | -2.70396900  | 2.20621200  | 1.86515300  |
| H | -2.39255200  | 4.66128100  | 1.88769400  |
| H | -3.40072900  | 6.06197500  | 0.10164400  |
| H | -4.73035200  | 4.98840400  | -1.70063300 |
| H | -5.03354000  | 2.52168200  | -1.71864100 |
| H | -7.77467400  | 0.78530700  | -0.33686600 |
| H | -10.15225300 | 0.14493900  | -0.60595100 |

|   |              |             |             |
|---|--------------|-------------|-------------|
| H | -10.79849900 | -2.25280700 | -0.63101000 |
| H | -9.05078900  | -4.00029000 | -0.38515100 |
| H | -6.66950600  | -3.34149300 | -0.11780300 |
| H | 0.88081600   | -4.71739300 | 1.10801200  |
| H | -0.88216300  | -4.71777700 | 1.10498700  |
| H | 0.00197100   | -4.87042200 | -0.42914800 |

**CDR1 OS**

|   |             |             |             |
|---|-------------|-------------|-------------|
| C | -3.43811300 | -1.49410600 | 0.21119100  |
| C | -3.02351800 | -0.11444800 | 0.11823100  |
| C | -1.67795900 | 0.23023500  | 0.08110600  |
| C | -0.71407700 | -0.77926300 | 0.19671300  |
| C | -1.12735900 | -2.14151700 | 0.34675700  |
| C | -2.45887000 | -2.50208300 | 0.34378400  |
| C | 0.71405700  | -0.77924600 | 0.19671800  |
| C | 1.12735000  | -2.14148800 | 0.34677000  |
| N | 0.00001200  | -2.94208800 | 0.46184000  |
| C | 1.67794200  | 0.23024700  | 0.08111500  |
| C | 3.02350200  | -0.11444500 | 0.11825600  |
| C | 3.43810100  | -1.49410400 | 0.21121500  |
| C | 2.45885300  | -2.50207900 | 0.34381100  |
| N | 4.07160100  | 0.80949800  | 0.04131100  |
| N | 5.36708800  | 0.43386500  | -0.11762500 |
| C | 5.63126700  | -0.86373900 | -0.05877700 |
| N | 4.73821500  | -1.84945300 | 0.14224100  |
| N | -4.73822800 | -1.84945600 | 0.14222300  |
| C | -5.63128400 | -0.86374200 | -0.05877300 |
| N | -5.36710500 | 0.43386300  | -0.11763100 |
| N | -4.07161600 | 0.80949400  | 0.04127200  |
| C | 3.87267900  | 2.22556400  | 0.05046600  |
| C | 7.05905200  | -1.24744100 | -0.21807300 |
| C | -3.87268300 | 2.22556000  | 0.05037100  |
| C | -7.05907300 | -1.24744100 | -0.21803400 |
| C | 7.41978800  | -2.60066600 | -0.22900800 |
| C | 8.75171500  | -2.97435400 | -0.37989700 |
| C | 9.74197200  | -2.00422900 | -0.52071300 |
| C | 9.39062100  | -0.65443300 | -0.50837300 |
| C | 8.06106000  | -0.27688100 | -0.35822400 |
| C | 4.46635200  | 3.00506000  | -0.94421200 |
| C | 4.30701300  | 4.38675800  | -0.92379100 |
| C | 3.55996600  | 4.99591500  | 0.08323100  |
| C | 2.97902400  | 4.21414300  | 1.08011300  |
| C | 3.13499500  | 2.83106400  | 1.07039700  |

|   |              |             |             |
|---|--------------|-------------|-------------|
| C | -3.13503500  | 2.83109600  | 1.07030600  |
| C | -2.97904800  | 4.21417400  | 1.07996600  |
| C | -3.55993900  | 4.99590600  | 0.08302300  |
| C | -4.30694900  | 4.38671300  | -0.92400500 |
| C | -4.46630200  | 3.00501500  | -0.94436900 |
| C | -8.06108200  | -0.27687900 | -0.35816700 |
| C | -9.39064800  | -0.65442800 | -0.50828200 |
| C | -9.74200300  | -2.00422300 | -0.52060500 |
| C | -8.75174600  | -2.97435000 | -0.37980700 |
| C | -7.41981400  | -2.60066500 | -0.22895200 |
| C | 0.00016400   | -4.38613400 | 0.56296500  |
| H | -1.37528300  | 1.26159900  | -0.04275800 |
| H | -2.80245500  | -3.52680600 | 0.40779200  |
| H | 1.37527800   | 1.26161300  | -0.04275600 |
| H | 2.80239700   | -3.52681500 | 0.40783200  |
| H | 6.64318500   | -3.34640200 | -0.11688900 |
| H | 9.01682100   | -4.02701300 | -0.38741800 |
| H | 10.78083900  | -2.29666000 | -0.63765700 |
| H | 10.15672300  | 0.10737800  | -0.61404000 |
| H | 7.78662400   | 0.77049200  | -0.34272300 |
| H | 5.05270400   | 2.52064600  | -1.71491900 |
| H | 4.76712800   | 4.98894600  | -1.70025400 |
| H | 3.43806600   | 6.07382700  | 0.09571000  |
| H | 2.41311600   | 4.68174800  | 1.87914000  |
| H | 2.70625800   | 2.22472900  | 1.85966100  |
| H | -2.70633900  | 2.22478900  | 1.85961400  |
| H | -2.41316900  | 4.68181000  | 1.87899500  |
| H | -3.43802700  | 6.07381800  | 0.09545700  |
| H | -4.76702300  | 4.98887200  | -1.70051400 |
| H | -5.05262600  | 2.52057200  | -1.71508000 |
| H | -7.78664200  | 0.77049300  | -0.34268000 |
| H | -10.15675000 | 0.10738500  | -0.61393600 |
| H | -10.78087500 | -2.29665100 | -0.63752200 |
| H | -9.01685500  | -4.02700900 | -0.38731400 |
| H | -6.64321200  | -3.34640400 | -0.11684800 |
| H | 0.88068400   | -4.71465500 | 1.11552500  |
| H | -0.88164000  | -4.71494300 | 1.11326000  |
| H | 0.00150200   | -4.86581400 | -0.42172100 |

**CDR2 CS**

|   |             |             |             |
|---|-------------|-------------|-------------|
| C | -1.12359000 | -1.12964400 | -0.00046400 |
| C | -0.70581900 | 0.23854300  | -0.11416400 |
| C | -2.44871200 | -1.50894900 | 0.04921800  |

|   |             |             |             |
|---|-------------|-------------|-------------|
| C | -3.41976200 | -0.48638400 | -0.03473000 |
| C | -3.03402200 | 0.91336300  | -0.11762700 |
| C | -1.68892000 | 1.24410700  | -0.16645900 |
| N | -4.75572800 | -0.73374800 | -0.01755900 |
| N | -5.71825700 | 0.23310900  | 0.01642000  |
| C | -5.26503600 | 1.49451100  | -0.03871500 |
| N | -4.00236000 | 1.88272000  | -0.12771400 |
| C | -5.30194900 | -2.06497600 | 0.00899800  |
| C | -6.31913800 | 2.54630800  | -0.00634900 |
| C | -5.95175200 | 3.89747500  | -0.00741000 |
| C | -6.92399900 | 4.89178400  | 0.02481600  |
| C | -8.27567600 | 4.55177800  | 0.05752300  |
| C | -8.64880400 | 3.20852900  | 0.05692300  |
| C | -7.67924900 | 2.21122700  | 0.02526400  |
| C | -6.12672800 | -2.43561700 | 1.06949100  |
| C | -6.68269900 | -3.71084700 | 1.08968200  |
| C | -6.42470400 | -4.60725900 | 0.05313100  |
| C | -5.61256300 | -4.22210600 | -1.01167700 |
| C | -5.05021900 | -2.94809600 | -1.03974400 |
| C | 0.70579100  | 0.23857300  | -0.11416700 |
| C | 1.12358400  | -1.12959300 | -0.00048300 |
| N | 0.00002700  | -1.94426700 | 0.04802500  |
| C | 1.68889400  | 1.24413200  | -0.16645500 |
| C | 3.03399900  | 0.91337000  | -0.11762400 |
| C | 3.41974900  | -0.48637600 | -0.03474300 |
| C | 2.44869300  | -1.50894200 | 0.04918700  |
| N | 4.00233400  | 1.88273000  | -0.12770200 |
| C | 5.26501300  | 1.49452600  | -0.03870300 |
| N | 5.71824100  | 0.23312800  | 0.01642200  |
| N | 4.75571400  | -0.73373400 | -0.01757200 |
| C | 0.00029900  | -3.37915400 | 0.23279300  |
| C | 6.31910800  | 2.54632900  | -0.00632600 |
| C | 5.30193900  | -2.06496000 | 0.00897300  |
| C | 5.05021600  | -2.94806800 | -1.03978100 |
| C | 5.61256600  | -4.22207600 | -1.01172900 |
| C | 6.42470500  | -4.60723800 | 0.05307700  |
| C | 6.68269300  | -3.71083900 | 1.08964000  |
| C | 6.12671500  | -2.43561100 | 1.06946400  |
| C | 7.67922100  | 2.21125600  | 0.02528200  |
| C | 8.64877000  | 3.20856400  | 0.05695100  |
| C | 8.27563400  | 4.55181100  | 0.05756500  |
| C | 6.92395400  | 4.89180900  | 0.02486300  |
| C | 5.95171400  | 3.89749400  | -0.00737300 |
| H | -2.74485900 | -2.54108200 | 0.16870900  |

|   |             |             |             |
|---|-------------|-------------|-------------|
| H | -1.42691600 | 2.29349000  | -0.22827900 |
| H | -4.89872800 | 4.14753100  | -0.03464300 |
| H | -6.62578200 | 5.93557700  | 0.02425700  |
| H | -9.03368500 | 5.32862700  | 0.08199400  |
| H | -9.69950500 | 2.93627700  | 0.07953600  |
| H | -7.96541500 | 1.16702000  | 0.02034900  |
| H | -6.33135600 | -1.72045900 | 1.85674700  |
| H | -7.32168400 | -4.00329500 | 1.91612600  |
| H | -6.86421100 | -5.59897200 | 0.07014400  |
| H | -5.42627300 | -4.90777300 | -1.83156800 |
| H | -4.43707100 | -2.63198300 | -1.87593500 |
| H | 1.42691000  | 2.29352000  | -0.22826700 |
| H | 2.74477400  | -2.54110100 | 0.16864100  |
| H | 0.87920300  | -3.81207000 | -0.24583400 |
| H | 0.00255100  | -3.65838800 | 1.29208800  |
| H | -0.88076700 | -3.81181200 | -0.24199200 |
| H | 4.43707000  | -2.63194700 | -1.87597000 |
| H | 5.42628200  | -4.90773400 | -1.83162900 |
| H | 6.86421700  | -5.59895000 | 0.07007800  |
| H | 7.32167600  | -4.00329500 | 1.91608200  |
| H | 6.33133700  | -1.72046200 | 1.85673000  |
| H | 7.96539400  | 1.16705200  | 0.02035700  |
| H | 9.69947300  | 2.93631900  | 0.07955900  |
| H | 9.03363800  | 5.32866400  | 0.08204300  |
| H | 6.62573100  | 5.93560000  | 0.02431400  |
| H | 4.89868800  | 4.14754300  | -0.03460200 |

**CDR2 T**

|   |             |             |             |
|---|-------------|-------------|-------------|
| C | -1.12953100 | -1.15633000 | 0.02215700  |
| C | -0.72291000 | 0.19998700  | -0.13639600 |
| C | -2.46833400 | -1.52676000 | 0.08002400  |
| C | -3.42754200 | -0.51538200 | -0.04414400 |
| C | -3.04893100 | 0.86273900  | -0.16880800 |
| C | -1.68517800 | 1.19461800  | -0.22605400 |
| N | -4.79909600 | -0.75715300 | -0.02453000 |
| N | -5.72149600 | 0.24494300  | 0.04022900  |
| C | -5.25890900 | 1.49182900  | -0.05527200 |
| N | -3.98302200 | 1.85742200  | -0.19904400 |
| C | -5.36718300 | -2.06989800 | 0.00532000  |
| C | -6.28856200 | 2.56578700  | -0.00608500 |
| C | -5.89326100 | 3.90906700  | -0.02667600 |
| C | -6.84347000 | 4.92423400  | 0.02091500  |
| C | -8.20047300 | 4.61370500  | 0.08869700  |

|   |             |             |             |
|---|-------------|-------------|-------------|
| C | -8.60162000 | 3.27833600  | 0.10728600  |
| C | -7.65484700 | 2.26068700  | 0.06010200  |
| C | -6.29869200 | -2.38871700 | 0.99488700  |
| C | -6.87962500 | -3.65263900 | 1.01255100  |
| C | -6.53785100 | -4.59957800 | 0.04807700  |
| C | -5.61712100 | -4.27176300 | -0.94547100 |
| C | -5.03337200 | -3.00808500 | -0.97385400 |
| C | 0.72288000  | 0.20003500  | -0.13645200 |
| C | 1.12954400  | -1.15625500 | 0.02206900  |
| N | 0.00006000  | -1.95957200 | 0.09840500  |
| C | 1.68514300  | 1.19467300  | -0.22603300 |
| C | 3.04889800  | 0.86277100  | -0.16879100 |
| C | 3.42753000  | -0.51535600 | -0.04419200 |
| C | 2.46833100  | -1.52674500 | 0.07994000  |
| N | 3.98299300  | 1.85745800  | -0.19895100 |
| C | 5.25886400  | 1.49187600  | -0.05504500 |
| N | 5.72146300  | 0.24498400  | 0.04039100  |
| N | 4.79908500  | -0.75711000 | -0.02460200 |
| C | 0.00050200  | -3.38952500 | 0.32057800  |
| C | 6.28849700  | 2.56584900  | -0.00566700 |
| C | 5.36717800  | -2.06987100 | 0.00487800  |
| C | 5.03331400  | -3.00779700 | -0.97452700 |
| C | 5.61708200  | -4.27147400 | -0.94652000 |
| C | 6.53786500  | -4.59955500 | 0.04689200  |
| C | 6.87967600  | -3.65287700 | 1.01160800  |
| C | 6.29873800  | -2.38895100 | 0.99431100  |
| C | 7.65477000  | 2.26077000  | 0.06085000  |
| C | 8.60151900  | 3.27843300  | 0.10821300  |
| C | 8.20036000  | 4.61379600  | 0.08947200  |
| C | 6.84336900  | 4.92430500  | 0.02135900  |
| C | 5.89318400  | 3.90912300  | -0.02640700 |
| H | -2.76734900 | -2.55420800 | 0.23233900  |
| H | -1.42745400 | 2.24297800  | -0.32172300 |
| H | -4.83672100 | 4.13866300  | -0.08142700 |
| H | -6.52304700 | 5.96127600  | 0.00505000  |
| H | -8.94113900 | 5.40655500  | 0.12509700  |
| H | -9.65694300 | 3.02855900  | 0.15637700  |
| H | -7.96388700 | 1.22296400  | 0.06876500  |
| H | -6.56439800 | -1.63979700 | 1.73054000  |
| H | -7.60167800 | -3.89808100 | 1.78430900  |
| H | -6.99422700 | -5.58364700 | 0.06447500  |
| H | -5.36326100 | -4.99504800 | -1.71349900 |
| H | -4.34012900 | -2.74035200 | -1.76286100 |
| H | 1.42744200  | 2.24304300  | -0.32164800 |

|   |             |             |             |
|---|-------------|-------------|-------------|
| H | 2.76724600  | -2.55423700 | 0.23219800  |
| H | 0.87949100  | -3.83480600 | -0.14643000 |
| H | 0.00414500  | -3.63840000 | 1.38721200  |
| H | -0.88193800 | -3.83426200 | -0.14025400 |
| H | 4.34002200  | -2.73986500 | -1.76342200 |
| H | 5.36318300  | -4.99455300 | -1.71472900 |
| H | 6.99424900  | -5.58362500 | 0.06299500  |
| H | 7.60176700  | -3.89852000 | 1.78326600  |
| H | 6.56446900  | -1.64023400 | 1.73016100  |
| H | 7.96382400  | 1.22305200  | 0.06962200  |
| H | 9.65683300  | 3.02867100  | 0.15756800  |
| H | 8.94100800  | 5.40665700  | 0.12601000  |
| H | 6.52293600  | 5.96134200  | 0.00537200  |
| H | 4.83665300  | 4.13870400  | -0.08140400 |

### CDR2 OS

|   |             |             |             |
|---|-------------|-------------|-------------|
| C | -1.12857400 | -1.15081800 | 0.01491700  |
| C | -0.72109500 | 0.20680000  | -0.13223300 |
| C | -2.46541500 | -1.52262100 | 0.07048500  |
| C | -3.42596900 | -0.50873500 | -0.04374500 |
| C | -3.04662400 | 0.87048000  | -0.15903700 |
| C | -1.68657700 | 1.20282800  | -0.21313600 |
| N | -4.79293900 | -0.75278600 | -0.02243400 |
| N | -5.72164300 | 0.24294800  | 0.03747500  |
| C | -5.25945700 | 1.49475300  | -0.05149500 |
| N | -3.98800100 | 1.86389100  | -0.18533700 |
| C | -5.35644800 | -2.06916600 | 0.00697300  |
| C | -6.29507800 | 2.56332800  | -0.00573700 |
| C | -5.90639200 | 3.90865500  | -0.02170900 |
| C | -6.86179200 | 4.91885500  | 0.02264500  |
| C | -8.21772100 | 4.60130000  | 0.08263400  |
| C | -8.61224900 | 3.26407100  | 0.09675100  |
| C | -7.66001000 | 2.25114100  | 0.05277400  |
| C | -6.26707100 | -2.39855400 | 1.01177100  |
| C | -6.84308800 | -3.66476900 | 1.03022900  |
| C | -6.51706000 | -4.60184800 | 0.05073100  |
| C | -5.61730800 | -4.26268400 | -0.95802600 |
| C | -5.03830300 | -2.99667800 | -0.98677700 |
| C | 0.72106400  | 0.20683200  | -0.13223800 |
| C | 1.12856700  | -1.15076600 | 0.01489500  |
| N | 0.00002900  | -1.95738300 | 0.08428300  |
| C | 1.68654700  | 1.20285500  | -0.21313400 |
| C | 3.04659700  | 0.87048900  | -0.15903300 |



|   |             |             |             |
|---|-------------|-------------|-------------|
| C | 3.42595300  | -0.50872700 | -0.04375500 |
| C | 2.46539400  | -1.52261600 | 0.07045800  |
| N | 3.98797200  | 1.86390300  | -0.18532700 |
| C | 5.25943000  | 1.49477000  | -0.05148800 |
| N | 5.72162300  | 0.24296700  | 0.03747700  |
| N | 4.79292200  | -0.75277000 | -0.02243900 |
| C | 0.00031500  | -3.38832900 | 0.29739900  |
| C | 6.29504500  | 2.56335000  | -0.00572500 |
| C | 5.35643700  | -2.06914800 | 0.00696200  |
| C | 5.03831500  | -2.99664800 | -0.98680500 |
| C | 5.61732900  | -4.26265000 | -0.95806200 |
| C | 6.51706700  | -4.60182000 | 0.05070500  |
| C | 6.84307200  | -3.66475200 | 1.03022100  |
| C | 6.26704500  | -2.39854200 | 1.01177200  |
| C | 7.65997900  | 2.25116900  | 0.05278000  |
| C | 8.61221300  | 3.26410400  | 0.09676000  |
| C | 8.21767800  | 4.60133100  | 0.08265200  |
| C | 6.86174800  | 4.91887900  | 0.02266900  |
| C | 5.90635200  | 3.90867600  | -0.02168800 |
| H | -2.76405300 | -2.55126000 | 0.21483900  |
| H | -1.42834300 | 2.25175300  | -0.30077800 |
| H | -4.85061400 | 4.14324800  | -0.07027900 |
| H | -6.54659000 | 5.95754800  | 0.01040900  |
| H | -8.96251600 | 5.39039700  | 0.11657400  |
| H | -9.66654700 | 3.00891000  | 0.13994300  |
| H | -7.96378000 | 1.21188000  | 0.05822500  |
| H | -6.52094000 | -1.65636000 | 1.75841700  |
| H | -7.54908200 | -3.91953800 | 1.81368800  |
| H | -6.96986200 | -5.58756800 | 0.06751000  |
| H | -5.37619800 | -4.97865600 | -1.73689200 |
| H | -4.36078000 | -2.71930600 | -1.78609000 |
| H | 1.42833400  | 2.25178600  | -0.30076800 |
| H | 2.76396300  | -2.55128100 | 0.21478200  |
| H | 0.87967200  | -3.83080600 | -0.17172900 |
| H | 0.00269100  | -3.64525200 | 1.36229200  |
| H | -0.88130600 | -3.83046700 | -0.16769100 |
| H | 4.36080300  | -2.71926900 | -1.78612500 |
| H | 5.37623600  | -4.97861300 | -1.73694100 |
| H | 6.96987600  | -5.58753700 | 0.06747800  |
| H | 7.54905500  | -3.91952800 | 1.81368800  |
| H | 6.52089700  | -1.65635600 | 1.75843200  |
| H | 7.96375400  | 1.21191000  | 0.05822400  |
| H | 9.66651300  | 3.00894800  | 0.13994700  |
| H | 8.96246900  | 5.39043100  | 0.11659400  |

|   |            |            |             |
|---|------------|------------|-------------|
| H | 6.54654000 | 5.95757100 | 0.01044000  |
| H | 4.85057300 | 4.14326400 | -0.07025300 |

***m*-Cz-ph CS**

|   |             |             |             |
|---|-------------|-------------|-------------|
| C | 3.42856700  | 0.18184700  | 0.04629300  |
| C | 3.06787700  | -1.20496700 | 0.03195100  |
| C | 1.67821300  | -1.55412300 | 0.01545600  |
| C | 0.73220300  | -0.56312400 | 0.00186000  |
| C | 1.13042300  | 0.80807800  | 0.00378900  |
| C | 2.48410100  | 1.17893700  | 0.03555300  |
| C | -0.73220300 | -0.56312400 | -0.00180900 |
| C | -1.13042400 | 0.80807800  | -0.00376100 |
| N | -0.00000100 | 1.59417000  | 0.00000800  |
| C | -1.67821300 | -1.55412400 | -0.01539000 |
| C | -3.06787600 | -1.20496900 | -0.03188900 |
| C | -3.42856700 | 0.18184500  | -0.04625600 |
| C | -2.48410200 | 1.17893600  | -0.03553100 |
| C | -0.00000100 | 3.03075900  | -0.00000300 |
| C | 4.05639100  | -2.21635400 | 0.03996700  |
| C | -4.05639000 | -2.21635600 | -0.03989100 |
| C | -0.49938200 | 3.71754100  | 1.10609700  |
| C | -0.49883500 | 5.10988200  | 1.09974700  |
| C | -0.00000100 | 5.80573900  | -0.00002500 |
| C | 0.49883300  | 5.10986500  | -1.09978600 |
| C | 0.49938000  | 3.71752400  | -1.10611400 |
| C | 5.43521300  | -1.89717800 | 0.05656300  |
| N | 6.55835900  | -1.61174400 | 0.06973800  |
| C | 3.71393600  | -3.58921700 | 0.03131700  |
| N | 3.41327100  | -4.70854100 | 0.02385700  |
| C | -5.43521200 | -1.89718200 | -0.05658400 |
| N | -6.55835700 | -1.61174900 | -0.06986600 |
| C | -3.71393500 | -3.58921900 | -0.03130600 |
| N | -3.41326600 | -4.70854300 | -0.02395400 |
| H | 4.47933100  | 0.44444300  | 0.07043100  |
| H | 1.39289500  | -2.60027200 | 0.01731100  |
| H | 2.78017200  | 2.22088300  | 0.05515800  |
| H | -1.39289400 | -2.60027300 | -0.01722900 |
| H | -4.47933100 | 0.44444000  | -0.07039800 |
| H | -2.78017400 | 2.22088000  | -0.05515200 |
| H | -0.86950500 | 3.16562600  | 1.96275300  |
| H | -0.88265700 | 5.64939200  | 1.95848700  |
| H | -0.00000200 | 6.89022000  | -0.00003300 |
| H | 0.88265400  | 5.64936100  | -1.95853500 |

|   |            |            |             |
|---|------------|------------|-------------|
| H | 0.86950400 | 3.16559500 | -1.96276100 |
|---|------------|------------|-------------|

***m*-Cz-ph T**

|   |             |             |             |
|---|-------------|-------------|-------------|
| C | -3.42103600 | 0.16486200  | -0.04277300 |
| C | -3.05139900 | -1.21137500 | -0.03108900 |
| C | -1.68116500 | -1.55710800 | -0.01455900 |
| C | -0.72589400 | -0.55411200 | -0.00303600 |
| C | -1.12873500 | 0.80750900  | -0.00572900 |
| C | -2.47919900 | 1.17282900  | -0.03181100 |
| C | 0.72589500  | -0.55411000 | 0.00304700  |
| C | 1.12873400  | 0.80751100  | 0.00573600  |
| N | -0.00000100 | 1.61830900  | 0.00000200  |
| C | 1.68116800  | -1.55710500 | 0.01457000  |
| C | 3.05140100  | -1.21137000 | 0.03109300  |
| C | 3.42103600  | 0.16486800  | 0.04277700  |
| C | 2.47919700  | 1.17283300  | 0.03181600  |
| C | -0.00000300 | 3.04968300  | -0.00000200 |
| C | -4.06638700 | -2.23238500 | -0.04001900 |
| C | 4.06639100  | -2.23237800 | 0.04002400  |
| C | 0.48733900  | 3.74212600  | -1.10936800 |
| C | 0.49114900  | 5.13462200  | -1.10257300 |
| C | -0.00000600 | 5.83141400  | -0.00001100 |
| C | -0.49116000 | 5.13462700  | 1.10255600  |
| C | -0.48734600 | 3.74213200  | 1.10935900  |
| C | -5.43984200 | -1.90727900 | -0.05610400 |
| N | -6.56338600 | -1.61919300 | -0.06881900 |
| C | -3.73078500 | -3.60336900 | -0.03247100 |
| N | -3.43370200 | -4.72448200 | -0.02601300 |
| C | 5.43984600  | -1.90727000 | 0.05610700  |
| N | 6.56338900  | -1.61918400 | 0.06885300  |
| C | 3.73078900  | -3.60336300 | 0.03255400  |
| N | 3.43371300  | -4.72447500 | 0.02590200  |
| H | -4.47294900 | 0.42511700  | -0.06347200 |
| H | -1.38786800 | -2.60107200 | -0.01325600 |
| H | -2.78096800 | 2.21300300  | -0.04716600 |
| H | 1.38787200  | -2.60106900 | 0.01327400  |
| H | 4.47294900  | 0.42512500  | 0.06347000  |
| H | 2.78096500  | 2.21300800  | 0.04716600  |
| H | 0.84939000  | 3.19112900  | -1.97038600 |
| H | 0.86979300  | 5.67401200  | -1.96394100 |
| H | -0.00000700 | 6.91601100  | -0.00001500 |
| H | -0.86980500 | 5.67402300  | 1.96391900  |
| H | -0.84939600 | 3.19113900  | 1.97038100  |

***m*-Cz-ph OS**

|   |             |             |             |
|---|-------------|-------------|-------------|
| C | 3.42345230  | 0.16923625  | 0.04284267  |
| C | 3.05517930  | -1.20817645 | 0.03091192  |
| C | 1.68066982  | -1.55452762 | 0.01452075  |
| C | 0.72731243  | -0.55385478 | 0.00266187  |
| C | 1.12953818  | 0.80951896  | 0.00508574  |
| C | 2.48077627  | 1.17508797  | 0.03204580  |
| C | -0.72731110 | -0.55385614 | -0.00270637 |
| C | -1.12953938 | 0.80951689  | -0.00511386 |
| N | -0.00000137 | 1.61390597  | -0.00001008 |
| C | -1.68066660 | -1.55453061 | -0.01457694 |
| C | -3.05517668 | -1.20818187 | -0.03096996 |
| C | -3.42345230 | 0.16923035  | -0.04287809 |
| C | -2.48077821 | 1.17508372  | -0.03206809 |
| C | -0.00000280 | 3.04644438  | -0.00000206 |
| C | 4.06230938  | -2.23000819 | 0.03967612  |
| C | -4.06230499 | -2.23001530 | -0.03974086 |
| C | -0.48847670 | 3.73776269  | 1.10923014  |
| C | -0.49137018 | 5.13022521  | 1.10258847  |
| C | -0.00000545 | 5.82685948  | 0.00001351  |
| C | 0.49136055  | 5.13023853  | -1.10256928 |
| C | 0.48846976  | 3.73777607  | -1.10922661 |
| C | 5.43762284  | -1.90880071 | 0.05548686  |
| N | 6.56176831  | -1.62422792 | 0.06807179  |
| C | 3.72274118  | -3.60104475 | 0.03230181  |
| N | 3.42377721  | -4.72138802 | 0.02581125  |
| C | -5.43762041 | -1.90881010 | -0.05542411 |
| N | -6.56176561 | -1.62423264 | -0.06792935 |
| C | -3.72273595 | -3.60105096 | -0.03224741 |
| N | -3.42376785 | -4.72139342 | -0.02579857 |
| H | 4.47515149  | 0.42978902  | 0.06392765  |
| H | 1.38880270  | -2.59892364 | 0.01388573  |
| H | 2.78168624  | 2.21556506  | 0.04802967  |
| H | -1.38879753 | -2.59892611 | -0.01395229 |
| H | -4.47515198 | 0.42978141  | -0.06396025 |
| H | -2.78169004 | 2.21556044  | -0.04804014 |
| H | -0.85128651 | 3.18652081  | 1.96970270  |
| H | -0.87004363 | 5.66962029  | 1.96389413  |
| H | -0.00000646 | 6.91143853  | 0.00001955  |
| H | 0.87003296  | 5.66964394  | -1.96386894 |
| H | 0.85128059  | 3.18654452  | -1.96970532 |

***p*-Cz-alkyl CS**

|   |             |             |             |
|---|-------------|-------------|-------------|
| C | -3.43206500 | -0.25058600 | -0.00000400 |
| C | -3.00040800 | -1.63500400 | -0.00002200 |
| C | -1.68360500 | -1.96855300 | -0.00009600 |
| C | -0.69782100 | -0.93876400 | -0.00017700 |
| C | -1.12791000 | 0.44721700  | -0.00023000 |
| C | -2.45003800 | 0.79180000  | -0.00008000 |
| C | 0.68957600  | -0.94336300 | -0.00017500 |
| C | 1.12392300  | 0.43877400  | -0.00023700 |
| N | 0.00268500  | 1.24902100  | -0.00042000 |
| C | 1.67519800  | -1.97318600 | -0.00008900 |
| C | 2.99215800  | -1.63771800 | -0.00001800 |
| C | 3.42650600  | -0.25359200 | -0.00001200 |
| C | 2.44443400  | 0.78919100  | -0.00010000 |
| C | 0.04386900  | 2.70114600  | -0.00027300 |
| C | -4.79822000 | 0.05382100  | 0.00011100  |
| C | 4.79294200  | 0.04868000  | 0.00009600  |
| C | -5.79533100 | -0.95644900 | 0.00024800  |
| N | -6.60286200 | -1.78588900 | 0.00035800  |
| C | -5.25292600 | 1.39885300  | 0.00018600  |
| N | -5.59581000 | 2.50454800  | 0.00024200  |
| C | 5.24933300  | 1.39315500  | 0.00012100  |
| N | 5.59435900  | 2.49816600  | 0.00013600  |
| C | 5.78869300  | -0.96298100 | 0.00020700  |
| N | 6.59488600  | -1.79371800 | 0.00029600  |
| H | -3.75798500 | -2.40929600 | 0.00004400  |
| H | -1.38238400 | -3.01024100 | -0.00008100 |
| H | -2.77699800 | 1.82388200  | 0.00002700  |
| H | 1.37598400  | -3.01543600 | -0.00006500 |
| H | 3.74948200  | -2.41234600 | 0.00005300  |
| H | 2.76273600  | 1.82432100  | -0.00001700 |
| H | -0.96944900 | 3.09515400  | -0.00285200 |
| H | 0.55583900  | 3.07230800  | 0.89093000  |
| H | 0.56011600  | 3.07211600  | -0.88906200 |

***p*-Cz-alkyl T**

|   |            |             |            |
|---|------------|-------------|------------|
| C | 3.43555700 | -0.26495700 | 0.00004300 |
| C | 3.03198100 | -1.63049800 | 0.00007300 |
| C | 1.69714700 | -1.97453000 | 0.00013300 |
| C | 0.72221900 | -0.96566500 | 0.00018000 |
| C | 1.12542900 | 0.40104600  | 0.00017600 |
| C | 2.46670400 | 0.76006800  | 0.00006100 |

|   |             |             |             |
|---|-------------|-------------|-------------|
| C | -0.71420100 | -0.97045400 | 0.00014100  |
| C | -1.12164100 | 0.39305300  | 0.00011500  |
| N | -0.00271900 | 1.20757900  | 0.00018700  |
| C | -1.68899300 | -1.97917700 | 0.00015300  |
| C | -3.02411800 | -1.63300300 | 0.00012200  |
| C | -3.43006000 | -0.26784100 | 0.00003200  |
| C | -2.46102200 | 0.75756700  | 0.00003000  |
| C | -0.04271200 | 2.65914500  | 0.00044400  |
| C | 4.83918100  | 0.07684300  | -0.00001300 |
| C | -4.83396000 | 0.07196700  | -0.00006300 |
| C | 5.84250100  | -0.91425800 | -0.00036900 |
| N | 6.65817700  | -1.73919900 | -0.00066100 |
| C | 5.26564100  | 1.42194000  | 0.00003600  |
| N | 5.58712000  | 2.53654600  | 0.00008400  |
| C | -5.26207700 | 1.41653500  | -0.00042700 |
| N | -5.58593400 | 2.53044100  | -0.00073100 |
| C | -5.83605400 | -0.92044000 | 0.00001200  |
| N | -6.65046400 | -1.74661700 | 0.00007400  |
| H | 3.78929700  | -2.40514200 | 0.00003500  |
| H | 1.40756900  | -3.01974000 | 0.00011300  |
| H | 2.77997500  | 1.79679100  | -0.00006100 |
| H | -1.40155100 | -3.02495500 | 0.00019400  |
| H | -3.78125200 | -2.40791200 | 0.00013300  |
| H | -2.76568100 | 1.79724800  | -0.00009800 |
| H | 0.97067300  | 3.05321000  | 0.00259600  |
| H | -0.55400300 | 3.03291500  | -0.89028300 |
| H | -0.55742100 | 3.03230600  | 0.88943900  |

***p*-Cz-alkyl OS**

|   |             |             |             |
|---|-------------|-------------|-------------|
| C | -3.43297548 | -0.25557153 | 0.00000794  |
| C | -3.01212473 | -1.63210597 | -0.00000235 |
| C | -1.68787487 | -1.96940884 | -0.00005707 |
| C | -0.70734332 | -0.94768869 | -0.00012488 |
| C | -1.12688778 | 0.43013135  | -0.00017497 |
| C | -2.45686609 | 0.77979394  | -0.00005672 |
| C | 0.69918801  | -0.95234799 | -0.00012369 |
| C | 1.12298597  | 0.42188375  | -0.00018125 |
| N | 0.00270584  | 1.23369387  | -0.00033010 |
| C | 1.67958130  | -1.97403125 | -0.00005146 |
| C | 3.00402913  | -1.63472513 | -0.00000074 |
| C | 3.42745445  | -0.25851605 | -0.00000307 |
| C | 2.45124950  | 0.77724164  | -0.00007536 |
| C | 0.04336465  | 2.68560818  | -0.00022166 |

|   |             |             |             |
|---|-------------|-------------|-------------|
| C | -4.81373688 | 0.06179256  | 0.00010057  |
| C | 4.80849159  | 0.05675512  | 0.00008292  |
| C | -5.81286391 | -0.94176831 | 0.00018710  |
| N | -6.62360574 | -1.76930905 | 0.00025820  |
| C | -5.25866626 | 1.40673560  | 0.00012130  |
| N | -5.59479780 | 2.51538769  | 0.00013335  |
| C | 5.25508883  | 1.40115494  | 0.00008578  |
| N | 5.59342665  | 2.50911981  | 0.00008405  |
| C | 5.80631084  | -0.94816020 | 0.00016782  |
| N | 6.61575222  | -1.77696643 | 0.00023634  |
| H | -3.76922920 | -2.40687855 | 0.00005294  |
| H | -1.39088371 | -3.01239391 | -0.00003630 |
| H | -2.77875652 | 1.81362924  | 0.00003288  |
| H | 1.38464836  | -3.01758373 | -0.00002359 |
| H | 3.76090663  | -2.40980834 | 0.00005946  |
| H | 2.76450926  | 1.81408818  | -0.00000806 |
| H | -0.97000945 | 3.07955965  | -0.00252609 |
| H | 0.55510299  | 3.05773219  | 0.89078733  |
| H | 0.55891372  | 3.05753527  | -0.88909279 |
